# Supplementary material for: Degradation of Microcystin-LR by Gas-Liquid Interfacial Discharge Plasma
Source: Royal Society of Chemistry journal article supplement (doi:10.1039/c0cp02754e), 2013-01-01
Supplement: c0cp02754e.pdf [file c0cp02754e.pdf]

Hydrogen-abstraction reactions of methyl ketones,  $\text{H}_3\text{COCH}_{3-x}(\text{CH}_3)_x$ ,  $x=0-2$ , by  $\cdot\text{OH}$ ; Chong-Wen Zhou  $\text{C}^3$

Table S1. Rotational constants and vibrational frequencies of Reactants, Complexes, Transition States and Products Computed at the MP2/6-311G(d,p) level.

| Species        | $I_a, I_b, I_c$ (GHZ) | Frequencies ( $\text{cm}^{-1}$ )                                                                                                                                                                                                                    |
|----------------|-----------------------|-----------------------------------------------------------------------------------------------------------------------------------------------------------------------------------------------------------------------------------------------------|
| <b>Acetone</b> | 10.1, 8.5, 4.9        | <b>79.1, 138.9</b> , 376.7, 481.3, 534.4, 803.4, 889.0, 906.0, 1091.3, 1121.2, 1253.8, 1395.4, 1405.8, 1482.3, 1486.2, 1491.5, 1506.8, 1787.6, 3075.2, 3080.0, 3158.2, 3163.1, 3204.2, 3205.3                                                       |
| <b>OH</b>      | 0.0, 570.9, 570.9     | 3857.1                                                                                                                                                                                                                                              |
| <b>RC1</b>     | 9.2, 2.3, 1.9         | 35.5, 47.5, 104.1, 162.4, 166.9, 386.5, 481.2, 487.3, 543.0, 550.1, 807.1, 896.3, 937.1, 1093.7, 1118.2, 1266.3, 1400.8, 1410.5, 1482.0, 1485.9, 1495.7, 1511.1, 1776.7, 3078.0, 3084.1, 3160.8, 3171.4, 3202.9, 3209.1, 3731.8                     |
| <b>TS1a</b>    | 9.4, 2.8, 2.3         | 2122.1 <i>i</i> , 47.5, <b>143.6</b> , 170.6, 278.1, 338.6, 439.8, 486.9, 532.7, 737.4, 815.9, 885.5, 935.8, 979.4, 1108.2, 1129.2, 1233.2, 1275.8, 1401.4, 1451.8, 1483.1, 1495.6, 1558.6, 1789.3, 3078.6, 3124.3, 3163.1, 3206.5, 3208.8, 3779.6  |
| <b>TS2a</b>    | 7.0, 2.8, 2.3         | 1745.0 <i>i</i> , 53.4, 90.5, <b>131.8</b> , 139.4, 354.9, 372.6, 513.7, 523.3, 748.1, 823.1, 859.4, 895.9, 989.5, 1099.8, 1145.8, 1249.1, 1305.3, 1399.3, 1442.9, 1461.4, 1492.0, 1499.2, 2124.0, 3081.3, 3131.2, 3170.3, 3213.4, 3230.2, 3840.8   |
| <b>TS3a</b>    | 5.2, 4.9, 4.3         | 853.7 <i>i</i> , <b>170.4, 234.9</b> , 250.4, 268.1, 317.4, 402.0, 503.0, 530.2, 814.6, 892.4, 908.7, 964.9, 1056.2, 1096.9, 1275.6, 1406.1, 1414.7, 1481.7, 1487.3, 1488.6, 1507.5, 1620.8, 3086.5, 3092.1, 3180.0, 3186.5, 3214.4, 3223.6, 3799.9 |
| <b>TS4a</b>    | 5.3, 4.9, 4.5         | 816.8 <i>i</i> , 168.6, 252.0, 282.7, 290.4, 421.2, 471.5, 542.0, 588.8, 760.6, 801.8, 840.4, 992.0, 1007.6, 1166.9, 1181.6, 1341.0, 1408.2, 1452.1, 1469.1, 1498.1, 1500.2, 1603.2, 3100.0, 3131.5, 3196.1, 3223.1, 3298.4, 3310.0, 3842.8         |
| <b>TS5a</b>    | 9.2, 2.3, 1.9         | 1551.2 <i>i</i> , 100.8, 143.7, 161.3, 178.1, 254.3, 302.0, 402.6, 507.9, 553.7, 911.5, 972.0, 996.2, 1074.9, 1176.7, 1234.0, 1240.0, 1381.1, 1382.4, 1399.1, 1481.5, 1488.6, 1970.6, 3080.9, 3087.2, 3186.4, 3207.2, 3267.7, 3305.8, 3855.0        |
| <b>IM1</b>     | 5.4, 5.1, 4.8         | 192.2, 242.5, 261.0, 314.3, 337.6, 444.1, 458.2, 545.3, 796.6, 923.1, 952.5, 965.8, 996.3, 1119.8, 1201.6, 1260.9, 1377.3, 1396.1, 1420.8, 1494.2, 1498.2, 1513.0, 1523.7, 3086.9,                                                                  |

**Hydrogen-abstraction reactions of methyl ketones, H<sub>3</sub>COCH<sub>3-x</sub>(CH<sub>3</sub>)<sub>x</sub>, x=0–2, by  $\cdot$ OH; Chong-Wen Zhou C<sup>3</sup>**  
3097.0, 3182.9, 3197.1, 3203.4, 3208.5, 3878.9

|                |                |                                                                                                                                                                                                                                                                                                                         |
|----------------|----------------|-------------------------------------------------------------------------------------------------------------------------------------------------------------------------------------------------------------------------------------------------------------------------------------------------------------------------|
| <b>PC1a</b>    | 10.2, 2.3, 1.9 | 56.2, 96.9, 129.5, 165.4, 186.0, 316.5, 351.8, 399.4, 539.8, 552.1, 677.7, 701.4, 835.8, 923.6, 1045.8, 1094.5, 1292.0, 1404.1, 1478.5, 1489.7, 1495.4, 1708.3, 2060.0, 3084.3, 3169.6, 3198.1, 3220.8, 3336.6, 3771.6, 3964.2                                                                                          |
| <b>EMK</b>     | 9.5, 3.6, 2.8  | 68.5, 108.7, <b>221.1</b> , 252.3, 400.7, 469.5, 595.5, 762.7, 782.0, 955.8, 965.8, 1019.1, 1124.8, 1139.0, 1205.2, 1296.6, 1381.5, 1406.8, 1432.7, 1471.8, 1487.8, 1499.1, 1516.3, 1520.6, 1781.4, 3066.8, 3077.9, 3090.3, 3112.4, 3161.5, 3179.2, 3187.3, 3202.2                                                      |
| <b>EMK-RC1</b> | 6.3, 1.6, 1.3  | 28.5, 49.6, 85.3, 123.8, 146.0, 224.7, 270.5, 411.8, 473.3, 501.5, 549.1, 597.5, 762.7, 788.1, 962.7, 995.9, 1021.1, 1123.8, 1137.5, 1208.8, 1297.8, 1390.3, 1409.9, 1434.5, 1466.5, 1491.9, 1510.4, 1516.2, 1520.9, 1768.9, 3066.5, 3084.0, 3092.3, 3110.0, 3172.3, 3182.9, 3187.4, 3198.2, 3727.2                     |
| <b>EMK-RC2</b> | 4.1, 1.9, 1.4  | 41.0, 74.3, 93.2, 129.1, 153.7, 232.0, 268.8, 402.6, 455.1, 475.1, 564.1, 606.1, 761.2, 789.3, 961.6, 975.6, 1025.6, 1127.7, 1140.0, 1212.9, 1297.8, 1386.6, 1413.1, 1439.7, 1470.4, 1485.1, 1499.1, 1521.4, 1532.7, 1778.0, 3066.0, 3079.2, 3092.5, 3115.9, 3163.3, 3176.1, 3204.0, 3205.9, 3752.0                     |
| <b>TS1b</b>    | 7.8, 1.7, 1.4  | 2101.1 <i>i</i> , 38.7, 89.3, 147.8, <b>223.6</b> , 254.7, 294.6, 368.7, 436.3, 477.8, 593.9, 727.7, 762.5, 821.6, 930.5, 973.3, 1018.7, 1030.3, 1129.0, 1132.4, 1229.0, 1240.7, 1298.8, 1391.8, 1433.3, 1456.1, 1467.8, 1516.1, 1520.5, 1561.5, 1783.6, 3068.5, 3092.2, 3113.0, 3125.6, 3182.8, 3188.7, 3211.1, 3781.3 |
| <b>TS2b</b>    | 4.4, 2.0, 1.6  | 1726.4 <i>i</i> , 50.7, 67.8, 92.0, 136.2, <b>218.1</b> , 247.9, 357.3, 394.8, 498.5, 586.7, 749.1, 777.0, 824.0, 878.9, 952.9, 1021.4, 1023.4, 1128.1, 1151.8, 1210.5, 1290.0, 1301.6, 1393.5, 1433.0, 1450.6, 1465.6, 1479.2, 1516.2, 1520.3, 2067.8, 3070.6, 3091.4, 3127.0, 3131.9, 3181.8, 3187.7, 3229.2, 3840.2  |
| <b>TS3b</b>    | 3.3, 2.7, 1.9  | 1446.4 <i>i</i> , 43.2, 87.7, <b>136.7</b> , 147.0, <b>190.5</b> , 219.5, 253.3, 400.8, 466.8, 597.0, 691.1, 782.3, 852.1, 921.0, 972.5, 1005.0, 1059.1, 1131.1, 1156.5, 1213.9, 1261.0, 1385.4, 1410.3,                                                                                                                |

**Hydrogen-abstraction reactions of methyl ketones,  $\text{H}_3\text{COCH}_{3-x}(\text{CH}_3)_x$ ,  $x=0-2$ , by  $\cdot\text{OH}$ ;** Chong-Wen Zhou  $C^3$

|             |                |                                                                                                                                                                                                                                                                                                                          |
|-------------|----------------|--------------------------------------------------------------------------------------------------------------------------------------------------------------------------------------------------------------------------------------------------------------------------------------------------------------------------|
|             |                | 1431.6, 1473.2, 1488.9, 1500.3, 1510.5, 1515.2, 1895.3, 3079.5, 3084.3, 3132.2, 3167.7, 3169.1, 3192.6, 3206.2, 3828.8                                                                                                                                                                                                   |
| <b>TS4b</b> | 7.7, 1.4, 1.2  | 1645.9 <i>i</i> , 48.1, 62.4, 83.2, <b>113.0</b> , 116.8, 218.2, 357.8, 409.2, 468.9, 593.2, 740.4, 770.3, 841.6, 895.5, 961.6, 984.4, 1074.6, 1134.6, 1143.2, 1199.9, 1292.4, 1322.3, 1376.6, 1404.4, 1470.6, 1471.6, 1486.6, 1493.8, 1498.4, 1780.1, 3075.3, 3080.3, 3125.8, 3135.6, 3162.8, 3203.1, 3214.9, 3847.4    |
| <b>TS5b</b> | 5.2, 2.1, 1.7  | 1901.9 <i>i</i> , 53.6, 112.2, <b>138.7</b> , 157.9, 243.6, 364.6, 402.4, 460.3, 473.6, 597.1, 704.6, 766.2, 851.7, 957.2, 971.6, 1004.4, 1038.8, 1120.0, 1148.2, 1209.2, 1264.6, 1323.4, 1388.0, 1414.5, 1456.5, 1479.6, 1484.9, 1498.9, 1510.9, 1779.4, 3064.9, 3078.9, 3111.4, 3131.3, 3162.7, 3205.8, 3214.9, 3799.6 |
| <b>PC1b</b> | 6.8, 1.5, 1.3  | 49.4, 64.6, 114.8, 149.3, 183.9, 218.0, 279.0, 315.9, 351.1, 421.9, 513.5, 608.6, 676.2, 682.0, 797.1, 824.5, 980.8, 1029.9, 1095.4, 1128.7, 1231.0, 1292.6, 1402.2, 1434.5, 1466.0, 1483.6, 1514.6, 1520.2, 1707.9, 2051.6, 3071.6, 3094.3, 3117.8, 3185.2, 3192.5, 3196.9, 3335.2, 3772.8, 3964.0                      |
| <b>PC2b</b> | 4.2, 1.9, 1.3  | 24.5, 61.5, 104.6, 119.5, 142.4, 156.6, 236.2, 264.6, 293.0, 420.7, 527.6, 606.6, 619.8, 644.7, 795.8, 967.5, 986.0, 1050.4, 1058.2, 1162.0, 1230.1, 1391.0, 1418.2, 1454.1, 1483.4, 1494.7, 1514.1, 1522.9, 1709.8, 2035.5, 3056.2, 3082.7, 3125.9, 3167.8, 3207.5, 3217.9, 3228.0, 3814.0, 3963.4                      |
| <b>PC3b</b> | 4.4, 1.8, 1.3  | 34.3, 70.6, 107.0, 129.5, 139.4, 155.8, 255.2, 275.2, 287.2, 408.3, 440.4, 484.6, 557.7, 605.8, 774.6, 809.0, 971.4, 1031.8, 1036.3, 1139.2, 1199.7, 1208.7, 1385.6, 1412.9, 1449.2, 1485.0, 1495.8, 1499.4, 1700.0, 1790.8, 3005.7, 3076.2, 3079.8, 3163.9, 3206.0, 3221.8, 3347.4, 3856.5, 3971.4                      |
| <b>P1b</b>  | 10.0, 3.8, 2.9 | 67.9, 212.4, 252.5, 261.3, 405.3, 497.6, 599.2, 623.4, 783.5, 824.6, 956.6, 1026.5, 1095.6, 1124.9, 1206.2, 1292.4, 1394.5, 1433.4, 1467.8, 1475.4, 1514.3, 1519.9, 2121.6, 3071.0, 3093.4, 3117.7, 3184.0, 3191.9, 3202.8, 3336.5                                                                                       |

Hydrogen-abstraction reactions of methyl ketones,  $\text{H}_3\text{COCH}_3-x(\text{CH}_3)_x$ ,  $x=0-2$ , by  $\cdot\text{OH}$ ; Chong-Wen Zhou  $\text{C}^3$

|               |                |                                                                                                                                                                                                                                                                                                                                                                                                    |
|---------------|----------------|----------------------------------------------------------------------------------------------------------------------------------------------------------------------------------------------------------------------------------------------------------------------------------------------------------------------------------------------------------------------------------------------------|
| <b>P2b</b>    | 10.1, 3.6, 2.8 | 64.6, 77.4, 129.9, 257.1, 413.6, 513.6, 606.9, 614.2, 782.5, 959.2, 981.3, 1048.7, 1052.1, 1158.1, 1218.3, 1385.8, 1405.4, 1444.8, 1484.2, 1495.5, 1501.9, 1505.9, 2090.5, 3059.0, 3081.9, 3124.0, 3167.7, 3194.0, 3215.9, 3229.1                                                                                                                                                                  |
| <b>P3b</b>    | 9.6, 3.8, 2.8  | 76.9, 124.0, 171.9, 269.3, 373.1, 409.1, 462.6, 594.4, 766.7, 810.8, 963.5, 1024.9, 1035.3, 1137.1, 1196.2, 1203.4, 1380.3, 1407.7, 1451.2, 1474.6, 1486.9, 1499.3, 1802.6, 3011.1, 3076.7, 3079.5, 3161.8, 3203.4, 3219.8, 3343.3                                                                                                                                                                 |
| <b>iPMKgt</b> | 4.7, 3.1, 2.1  | 61.3, <b>140.8</b> , <b>215.5</b> , <b>235.4</b> , 263.1, 315.8, 353.1, 434.6, 559.3, 621.5, 737.2, 920.6, 938.5, 976.3, 982.1, 1005.6, 1130.3, 1161.8, 1184.3, 1234.0, 1330.8, 1376.2, 1401.7, 1418.3, 1435.3, 1487.8, 1497.4, 1506.2, 1509.5, 1525.3, 1529.4, 1770.5, 3059.6, 3069.8, 3079.1, 3080.3, 3157.0, 3164.4, 3169.0, 3169.8, 3179.6, 3198.6                                             |
| <b>RC1c</b>   | 4.2, 1.3, 1.1  | 29.4, 46.4, 69.2, 140.6, 146.4, 214.5, 240.7, 257.7, 314.3, 349.3, 442.4, 510.8, 556.0, 581.6, 627.3, 747.0, 920.2, 940.7, 982.5, 997.8, 1016.8, 1131.0, 1156.6, 1183.8, 1236.2, 1327.9, 1387.6, 1406.4, 1420.1, 1436.1, 1493.2, 1503.3, 1506.7, 1510.4, 1525.0, 1529.5, 1759.3, 3069.6, 3072.9, 3081.5, 3085.7, 3162.4, 3169.2, 3173.1, 3173.5, 3178.3, 3198.6, 3723.0                            |
| <b>RC2c</b>   | 2.8, 1.6, 1.2  | 26.5, 61.9, 91.9, 113.0, 152.1, 219.5, 243.4, 273.7, 307.7, 348.8, 436.6, 458.1, 556.7, 573.9, 629.5, 745.1, 921.7, 939.6, 979.8, 991.8, 1011.5, 1133.3, 1160.1, 1183.7, 1236.3, 1328.9, 1385.0, 1405.6, 1420.5, 1439.5, 1487.7, 1497.2, 1508.2, 1515.9, 1527.3, 1532.6, 1766.5, 3068.2, 3072.4, 3082.1, 3083.7, 3161.9, 3167.8, 3170.2, 3171.3, 3189.1, 3201.8, 3753.1                            |
| <b>TS1c</b>   | 4.5, 1.4, 1.2  | 2074.4 <i>i</i> , 40.7, 68.7, 147.7, <b>212.1</b> , <b>226.7</b> , 248.5, 300.2, 328.4, 340.1, 418.3, 440.5, 570.0, 620.3, 723.9, 799.8, 916.0, 934.5, 948.4, 984.5, 992.3, 1045.4, 1128.9, 1165.4, 1198.9, 1240.7, 1246.5, 1327.4, 1385.0, 1418.3, 1436.0, 1458.4, 1503.6, 1508.8, 1524.1, 1528.0, 1561.4, 1782.0, 3065.5, 3071.2, 3081.9, 3126.8, 3160.6, 3168.2, 3173.2, 3180.2, 3213.1, 3781.1 |
| <b>TS2c</b>   | 2.8, 1.8, 1.4  | 1764.3 <i>i</i> , 39.8, 58.0, 101.4, 125.1, <b>213.4</b> , <b>231.5</b> , 269.2, 316.6, 341.0, 363.3, 443.4, 544.2, 617.9, 724.0, 800.1, 909.9, 925.6,                                                                                                                                                                                                                                             |

**Hydrogen-abstraction reactions of methyl ketones,  $\text{H}_3\text{COCH}_3\text{-(CH}_3\text{)}_x$ ,  $x=0-2$ , by  $\cdot\text{OH}$ ;** Chong-Wen Zhou  $\text{C}^3$

|             |               |                                                                                                                                                                                                                                                                                                                                                                                                             |
|-------------|---------------|-------------------------------------------------------------------------------------------------------------------------------------------------------------------------------------------------------------------------------------------------------------------------------------------------------------------------------------------------------------------------------------------------------------|
|             |               | 940.2, 955.0, 984.9, 1015.2, 1133.2, 1168.6, 1185.9, 1234.0, 1301.5, 1335.1, 1382.6, 1416.5, 1429.2, 1435.4, 1455.9, 1504.4, 1510.3, 1524.9, 1531.0, 1923.1, 3069.6, 3080.0, 3083.4, 3126.7, 3157.3, 3168.6, 3174.5, 3181.2, 3218.3, 3834.7                                                                                                                                                                 |
| <b>TS3c</b> | 2.3, 2.0, 1.8 | 1006.1 <i>i</i> , 38.6, 82.0, 96.8, <b>164.3</b> , 181.3, <b>203.6</b> , <b>222.4</b> , 273.7, 318.2, 355.5, 426.9, 549.7, 591.8, 684.5, 722.9, 900.4, 945.7, 968.3, 981.70, 1019.5, 1043.0, 1152.9, 1178.8, 1210.3, 1251.2, 1344.7, 1399.1, 1415.5, 1423.1, 1437.4, 1488.1, 1497.1, 1503.3, 1506.0, 1520.1, 1529.2, 1875.4, 3066.0, 3076.5, 3081.7, 3153.3, 3162.2, 3171.0, 3179.9, 3185.1, 3203.6, 3830.5 |
| <b>TS4c</b> | 3.0, 1.9, 1.3 | 1845.9 <i>i</i> , 54.5, 75.6, 151.8, <b>157.2</b> , <b>225.6</b> , 256.7, 308.0, 320.0, 385.8, 425.1, 438.5, 554.8, 622.6, 728.1, 796.0, 915.3, 945.1, 972.7, 986.0, 995.6, 1023.2, 1136.6, 1161.7, 1171.9, 1231.1, 1299.6, 1322.7, 1384.6, 1408.3, 1422.2, 1474.9, 1485.3, 1498.5, 1504.5, 1520.3, 1525.1, 1768.7, 3069.4, 3073.7, 3080.9, 3120.7, 3162.5, 3166.6, 3172.9, 3202.2, 3206.1, 3816.1          |
| <b>TS5c</b> | 4.3, 1.3, 1.1 | 1575.4 <i>i</i> , 58.8, 61.3, 93.8, 117.9, <b>145.9</b> , 220.9, <b>245.5</b> , 304.8, 335.1, 402.4, 434.1, 555.5, 611.4, 734.5, 817.3, 898.4, 940.0, 957.8, 984.9, 989.8, 1045.2, 1139.4, 1165.9, 1184.3, 1236.3, 1321.5, 1332.1, 1377.1, 1401.3, 1423.9, 1467.2, 1481.7, 1487.5, 1498.5, 1521.9, 1532.1, 1768.4, 3061.4, 3074.2, 3079.9, 3126.6, 3163.3, 3166.3, 3182.8, 3199.5, 3206.7, 3842.8           |
| <b>TS6c</b> | 3.2, 1.8, 1.5 | 1925.9 <i>i</i> , 49.6, 122.1, <b>152.3</b> , 165.1, 223.9, <b>241.6</b> , 276.9, 320.7, 395.9, 440.1, 518.4, 601.1, 609.6, 715.7, 798.8, 912.7, 947.4, 978.4, 986.0, 1019.0, 1031.1, 1139.9, 1162.1, 1177.4, 1217.7, 1304.4, 1333.8, 1384.4, 1410.9, 1421.9, 1474.1, 1481.8, 1497.2, 1499.2, 1515.9, 1529.4, 1772.9, 3064.7, 3075.6, 3077.3, 3118.1, 3160.3, 3164.6, 3185.2, 3202.2, 3204.7, 3769.4        |
| <b>TS7c</b> | 3.1, 1.8, 1.2 | 1614.3 <i>i</i> , 38.9, 80.3, 130.4, <b>179.2</b> , 192.5, <b>234.2</b> , 243.7, 294.0, 331.6, 379.1, 438.0, 555.4, 620.6, 698.4, 768.8, 901.5, 944.4, 964.7, 979.5, 998.1, 1021.7, 1125.8, 1156.7, 1182.6, 1223.0, 1316.6, 1339.2, 1368.3, 1406.0, 1425.2, 1440.8, 1487.8,                                                                                                                                 |

**Hydrogen-abstraction reactions of methyl ketones,  $\text{H}_3\text{COCH}_{3-x}(\text{CH}_3)_x$ ,  $x=0-2$ , by  $\cdot\text{OH}$ ;** Chong-Wen Zhou  $\text{C}^3$

|             |               |                                                                                                                                                                                                                                                                                                                                                                         |
|-------------|---------------|-------------------------------------------------------------------------------------------------------------------------------------------------------------------------------------------------------------------------------------------------------------------------------------------------------------------------------------------------------------------------|
|             |               | 1494.5, 1504.4, 1512.0, 1514.4, 1771.1, 3066.2, 3080.0, 3082.0, 3106.8, 3169.7, 3172.8, 3183.5, 3186.9, 3212.9, 3842.7                                                                                                                                                                                                                                                  |
| <b>PC1c</b> | 4.4, 1.2, 1.1 | 40.5, 49.2, 113.6, 147.8, 183.7, 208.1, 234.0, 255.7, 313.3, 322.4, 341.2, 361.1, 451.7, 609.6, 640.8, 681.6, 754.9, 799.5, 927.6, 944.5, 984.2, 1002.9, 1116.9, 1155.5, 1198.4, 1243.8, 1333.3, 1398.7, 1421.5, 1434.6, 1481.8, 1504.1, 1507.6, 1522.2, 1529.6, 1708.8, 2041.0, 3071.3, 3082.2, 3084.5, 3164.1, 3168.5, 3172.3, 3186.6, 3196.3, 3334.3, 3767.5, 3963.6 |
| <b>PC2c</b> | 3.2, 1.5, 1.0 | 18.3, 66.6, 82.1, 101.0, 143.4, 157.6, 182.5, 228.7, 281.5, 293.1, 301.3, 370.6, 451.3, 554.1, 579.1, 643.6, 701.3, 945.0, 963.1, 988.4, 1002.4, 1013.8, 1065.7, 1172.5, 1311.7, 1369.6, 1411.1, 1420.3, 1428.0, 1481.5, 1490.6, 1500.3, 1508.8, 1518.8, 1523.5, 1711.5, 1980.9, 3045.0, 3050.0, 3083.4, 3116.8, 3125.9, 3168.5, 3186.5, 3215.7, 3218.5, 3811.3, 3962.7 |
| <b>PC3c</b> | 2.9, 1.5, 1.1 | 27.2, 56.7, 103.6, 112.3, 140.2, 176.6, 228.5, 264.3, 270.1, 272.4, 315.1, 355.8, 443.4, 539.6, 565.3, 580.1, 632.4, 739.4, 925.0, 966.2, 989.5, 1008.9, 1072.5, 1124.9, 1165.7, 1211.3, 1301.0, 1387.7, 1407.4, 1415.1, 1488.5, 1494.9, 1498.5, 1517.8, 1519.8, 1702.5, 1777.5, 3059.7, 3074.0, 3082.7, 3167.2, 3170.9, 3174.6, 3201.1, 3209.4, 3336.3, 3851.6, 3969.7 |
| <b>PC4c</b> | 2.8, 1.7, 1.4 | 52.2, 84.2, 113.1, 144.3, 153.1, 181.5, 208.0, 234.5, 273.4, 281.4, 323.7, 336.0, 440.5, 538.3, 571.7, 599.0, 617.6, 763.7, 934.8, 945.7, 978.6, 1033.4, 1075.3, 1147.5, 1187.3, 1222.4, 1322.1, 1371.2, 1399.9, 1422.2, 1481.4, 1484.1, 1497.4, 1516.5, 1529.5, 1693.0, 1792.6, 3076.0, 3084.7, 3095.5, 3161.1, 3171.5, 3196.2, 3204.4, 3210.2, 3324.3, 3818.9, 3969.9 |
| <b>P1c</b>  | 4.9, 3.0, 2.3 | 51.3, 203.9, 222.1, 243.2, 277.4, 302.1, 340.1, 437.6, 576.5, 603.4, 738.9, 786.4, 925.5, 942.9, 964.7, 995.6, 1115.1, 1154.3, 1186.4, 1231.8, 1332.5, 1394.0, 1419.0, 1434.1, 1473.3, 1503.8, 1507.4, 1522.3, 1528.9, 2105.2, 3070.6, 3078.8, 3082.2, 3162.7, 3166.8, 3171.3, 3185.3, 3202.1, 3335.1                                                                   |

**Hydrogen-abstraction reactions of methyl ketones,  $\text{H}_3\text{COCH}_3\text{-(CH}_3\text{)}_x$ ,  $x=0-2$ , by  $\cdot\text{OH}$ ;** Chong-Wen Zhou  $\text{C}^3$

|                   |               |                                                                                                                                                                                                                                                                                                                                                                         |
|-------------------|---------------|-------------------------------------------------------------------------------------------------------------------------------------------------------------------------------------------------------------------------------------------------------------------------------------------------------------------------------------------------------------------------|
| <b>P2c</b>        | 4.7, 3.2, 2.0 | 61.5, 80.0, 94.5, 182.1, 273.9, 282.3, 359.2, 444.6, 556.2, 580.5, 692.7, 943.1, 953.3, 985.4, 992.5, 1013.5, 1066.5, 1170.4, 1312.9, 1356.2, 1403.2, 1409.4, 1425.5, 1481.3, 1486.9, 1498.7, 1503.5, 1512.6, 1515.6, 2036.8, 3040.5, 3050.0, 3082.6, 3112.3, 3123.2, 3168.2, 3181.8, 3202.3, 3214.2                                                                    |
| <b>P3c</b>        | 4.8, 3.2, 2.1 | 45.3, 149.2, 151.1, 230.1, 276.8, 303.1, 343.3, 404.5, 457.5, 553.8, 627.1, 732.6, 921.6, 971.2, 974.2, 995.6, 1081.1, 1121.7, 1169.8, 1197.5, 1300.6, 1368.9, 1402.7, 1417.0, 1470.0, 1487.7, 1498.5, 1518.6, 1523.5, 1789.4, 3013.9, 3074.6, 3080.2, 3165.8, 3168.3, 3171.0, 3200.0, 3213.4, 3340.4                                                                   |
| <b>P4c</b>        | 4.8, 3.1, 2.2 | 56.1, 104.3, 180.5, 235.2, 239.4, 294.4, 350.7, 421.8, 485.1, 560.6, 624.0, 745.1, 914.5, 946.5, 976.5, 1004.5, 1076.8, 1156.8, 1185.0, 1218.7, 1285.6, 1365.5, 1397.5, 1426.5, 1484.2, 1489.7, 1498.1, 1513.3, 1514.9, 1776.2, 3062.8, 3080.7, 3085.4, 3167.2, 3179.3, 3181.7, 3195.3, 3199.7, 3314.2                                                                  |
| <b>iPMK-g</b>     | 4.5, 2.7, 2.4 | 57.4, 154.3, 211.8, 241.9, 277.2, 279.7, 334.1, 494.4, 530.1, 599.1, 739.2, 923.1, 944.5, 959.4, 982.9, 1028.4, 1104.6, 1153.3, 1205.3, 1278.4, 1347.5, 1362.9, 1398.8, 1412.0, 1433.7, 1482.9, 1496.9, 1507.1, 1514.5, 1526.9, 1529.8, 1769.0, 3067.7, 3068.8, 3080.5, 3104.9, 3155.5, 3158.3, 3161.4, 3164.4, 3166.3, 3201.6                                          |
| <b>iPMK-g-RC1</b> | 4.5, 1.1, 1.1 | 29.4, 40.2, 66.6, 136.1, 155.6, 201.9, 250.5, 258.8, 280.6, 338.4, 494.9, 512.9, 540.8, 555.7, 611.5, 743.0, 926.8, 946.7, 975.2, 984.5, 1027.9, 1103.4, 1150.2, 1205.7, 1290.7, 1353.7, 1362.6, 1404.4, 1413.9, 1435.4, 1484.4, 1505.3, 1506.2, 1514.5, 1526.5, 1530.6, 1758.3, 3070.8, 3071.6, 3085.9, 3109.7, 3160.8, 3162.4, 3164.4, 3166.2, 3173.8, 3204.5, 3724.1 |
| <b>iPMK-g-RC2</b> | 2.8, 1.7, 1.3 | 55.7, 67.7, 73.4, 161.8, 175.6, 229.5, 234.4, 281.4, 290.5, 340.3, 495.2, 502.0, 540.0, 570.6, 605.5, 745.2, 925.6, 948.5, 968.0, 986.7, 1031.2, 1110.1, 1157.7, 1207.7, 1287.7, 1344.0, 1383.6, 1403.0, 1416.4, 1439.9, 1480.9, 1496.4, 1509.8, 1515.6, 1527.8, 1533.7, 1758.2, 3070.3, 3071.5, 3082.7, 3105.8, 3158.5, 3161.4, 3164.5, 3166.9, 3176.0, 3205.7,        |

**Hydrogen-abstraction reactions of methyl ketones,  $\text{H}_3\text{COCH}_{3-x}(\text{CH}_3)_x$ ,  $x=0-2$ , by  $\cdot\text{OH}$ ;** Chong-Wen Zhou  $\text{C}^3$   
3713.1

|             |                |                                                                                                                                                                                                                                                                                                                                                                                     |
|-------------|----------------|-------------------------------------------------------------------------------------------------------------------------------------------------------------------------------------------------------------------------------------------------------------------------------------------------------------------------------------------------------------------------------------|
| <b>TS1d</b> | 4.2, 1.3, 1.3  | 2096.7 <i>i</i> , 37.9, 61.5, 161.3, 203.5, 234.8, 246.5, 261.9, 290.9, 335.4, 449.7, 480.7, 534.7, 606.9, 712.9, 794.1, 922.0, 936.6, 947.1, 983.1, 996.2, 1026.2, 1143.9, 1148.3, 1206.6, 1233.6, 1294.1, 1348.3, 1361.9, 1413.6, 1435.0, 1449.9, 1504.4, 1513.0, 1525.1, 1528.1, 1554.0, 1771.0, 3069.7, 3071.4, 3108.5, 3126.8, 3159.6, 3161.8, 3163.9, 3167.4, 3211.8, 3775.5  |
| <b>TS2d</b> | 3.3, 1.7, 1.4  | 1807.8 <i>i</i> , 39.2, 57.5, 116.2, 191.4, 234.1, 249.4, 272.9, 305.2, 333.8, 379.1, 488.0, 532.6, 584.2, 737.4, 816.8, 925.9, 947.2, 954.5, 969.0, 992.4, 1066.4, 1115.5, 1146.7, 1205.6, 1261.4, 1300.3, 1351.7, 1360.4, 1415.2, 1437.0, 1474.7, 1503.0, 1511.3, 1525.3, 1527.0, 1534.7, 1894.5, 3069.6, 3073.7, 3108.9, 3144.7, 3158.8, 3162.8, 3164.0, 3173.7, 3240.0, 3818.9  |
| <b>TS3d</b> | 2.6, 2.1, 1.6  | 1610.3 <i>i</i> , 54.0, 88.9, 158.6, 163.0, 209.3, 228.0, 261.5, 277.9, 327.1, 436.3, 453.3, 527.5, 602.2, 636.5, 747.3, 931.4, 954.4, 968.3, 976.8, 993.1, 1043.0, 1127.8, 1153.1, 1214.9, 1255.5, 1310.6, 1398.9, 1409.3, 1429.7, 1480.4, 1493.9, 1499.3, 1500.3, 1507.1, 1520.2, 1533.6, 1766.3, 3063.0, 3064.4, 3080.8, 3150.3, 3151.8, 3165.3, 3168.3, 3175.0, 3203.9, 3779.2  |
| <b>TS4d</b> | 2.67, 1.8, 1.4 | 1605.9 <i>i</i> , 47.9, 89.0, 110.9, 156.9, 214.8, 230.6, 243.7, 280.8, 315.3, 396.5, 490.6, 528.3, 597.1, 688.0, 750.9, 907.0, 939.9, 965.4, 984.8, 1017.5, 1053.2, 1113.5, 1162.9, 1216.2, 1269.5, 1322.8, 1342.2, 1370.4, 1396.3, 1414.1, 1459.3, 1482.5, 1498.1, 1506.1, 1516.2, 1518.5, 1774.9, 3068.1, 3080.4, 3109.6, 3114.5, 3158.5, 3169.8, 3170.8, 3190.9, 3203.7, 3838.4 |
| <b>PC1d</b> | 4.7, 1.1, 1.1  | 35.2, 53.6, 114.1, 156.5, 182.0, 199.9, 249.3, 256.1, 288.7, 326.5, 338.3, 364.3, 509.9, 542.9, 647.0, 685.5, 762.4, 809.0, 934.0, 948.9, 971.6, 992.6, 1108.3, 1140.5, 1207.6, 1315.7, 1352.5, 1366.1, 1415.3, 1437.4, 1485.2, 1502.5, 1513.0, 1526.2, 1528.2, 1709.4, 2033.4, 3071.3, 3072.2, 3121.2, 3161.1, 3164.7, 3165.7, 3167.6, 3201.8, 3338.3, 3764.0, 3963.4              |
| <b>PC2d</b> | 3.2, 1.5, 1.0  | 18.3, 66.6, 82.1, 101.0, 143.4, 157.6, 182.5, 228.7, 281.5,                                                                                                                                                                                                                                                                                                                         |



**Hydrogen-abstraction reactions of methyl ketones,  $H_3COCH_{3-x}(CH_3)_x$ ,  $x=0-2$ , by  $\cdot OH$ ;** Chong-Wen Zhou  $C^3$   
 293.1, 301.3, 370.6, 451.3, 554.1, 579.1, 643.6, 701.3, 945.0,  
 963.1, 988.4, 1002.4, 1013.8, 1065.7, 1172.5, 1311.7, 1369.6,  
 1411.1, 1420.3, 1428.0, 1481.5, 1490.6, 1500.3, 1508.8,  
 1518.8, 1523.5, 1711.5, 1980.9, 3045.0, 3050.0, 3083.4,  
 3116.8, 3125.9, 3168.5, 3186.5, 3215.7, 3218.5, 3811.3,  
 3962.7

**PC3d**      2.8, 1.7, 1.3      43.8, 82.2, 91.6, 136.0, 157.5, 172.2, 225.8, 227.6, 273.2,  
 286.0, 327.6, 343.8, 462.3, 512.3, 533.9, 587.2, 609.0, 755.8,  
 922.1, 948.0, 967.1, 1035.0, 1070.2, 1156.4, 1195.6, 1253.4,  
 1307.3, 1367.9, 1399.6, 1425.6, 1470.1, 1481.7, 1496.8,  
 1519.8, 1525.0, 1701.1, 1774.8, 3073.8, 3082.7, 3117.3,  
 3163.9, 3168.2, 3170.7, 3199.3, 3204.2, 3331.9, 3805.6,  
 3970.0

Table S2. Predicted Morse parameters for the processes we investigated.

| Complex | Scan range (Å) | De (kcal·mol <sup>-1</sup> ) | B (Å <sup>-1</sup> ) |
|---------|----------------|------------------------------|----------------------|
| RC1a    | 1.908...7.908  | 7.60                         | 1.04                 |
| RC1b    | 1.951...7.201  | 8.00                         | 1.18                 |
| RC2b    | 1.960...7.960  | 7.48                         | 1.21                 |
| RC1c    | 1.946...7.946  | 7.57                         | 1.12                 |
| RC2c    | 1.961...7.961  | 7.44                         | 1.21                 |

## Coordinates of the species obtained at MP2/6-311G(d,p) level:

### RC1a

|   |              |              |              |
|---|--------------|--------------|--------------|
| 6 | 0.661482000  | -0.094142000 | -0.048385000 |
| 8 | -0.101064000 | -1.044327000 | -0.136672000 |
| 6 | 0.158462000  | 1.335539000  | -0.064173000 |
| 1 | 0.920533000  | 2.028840000  | -0.425899000 |
| 1 | -0.742489000 | 1.412373000  | -0.674685000 |
| 1 | -0.101917000 | 1.616704000  | 0.962172000  |
| 6 | 2.150796000  | -0.290079000 | 0.112645000  |
| 1 | 2.662485000  | 0.084548000  | -0.780168000 |
| 1 | 2.514863000  | 0.293210000  | 0.964139000  |
| 1 | 2.376186000  | -1.347174000 | 0.251964000  |
| 8 | -2.831043000 | -0.106106000 | 0.101896000  |
| 1 | -1.997235000 | -0.592945000 | -0.019835000 |

Hydrogen-abstraction reactions of methyl ketones,  $\text{H}_3\text{COCH}_3\text{-(CH}_3\text{)}_x$ ,  $x=0-2$ , by  $\cdot\text{OH}$ ; Chong-Wen Zhou  $\text{C}^3$

**TS1a**

|   |              |              |              |
|---|--------------|--------------|--------------|
| 6 | 0.608718000  | -0.129756000 | 0.058282000  |
| 8 | 0.173633000  | -1.263959000 | 0.160426000  |
| 6 | -0.292075000 | 1.077900000  | 0.178478000  |
| 1 | -0.028528000 | 1.895481000  | -0.494758000 |
| 1 | -1.421206000 | 0.718634000  | -0.103153000 |
| 1 | -0.347909000 | 1.422798000  | 1.213640000  |
| 6 | 2.077642000  | 0.148619000  | -0.172844000 |
| 1 | 2.207321000  | 0.581348000  | -1.170438000 |
| 1 | 2.443344000  | 0.882495000  | 0.551453000  |
| 1 | 2.646968000  | -0.777906000 | -0.096363000 |
| 8 | -2.416767000 | -0.042094000 | -0.195079000 |
| 1 | -1.920630000 | -0.854999000 | -0.006644000 |

**TS2a**

|   |              |              |              |
|---|--------------|--------------|--------------|
| 6 | 0.823517000  | -0.136603000 | 0.029343000  |
| 8 | 1.706744000  | -0.734183000 | -0.538354000 |
| 6 | -0.365658000 | -0.864008000 | 0.627219000  |
| 1 | -0.567370000 | -0.565451000 | 1.657918000  |
| 1 | -1.299640000 | -0.493925000 | -0.025855000 |
| 1 | -0.295115000 | -1.944077000 | 0.502856000  |
| 6 | 0.806754000  | 1.369740000  | 0.186171000  |
| 1 | -0.157084000 | 1.759394000  | -0.151133000 |
| 1 | 0.919578000  | 1.624762000  | 1.245378000  |
| 1 | 1.624623000  | 1.807094000  | -0.385869000 |
| 8 | -2.327737000 | 0.161477000  | -0.490027000 |
| 1 | -2.844729000 | 0.179074000  | 0.327363000  |

**TS3a**

|   |              |              |              |
|---|--------------|--------------|--------------|
| 6 | 0.170142000  | 0.037602000  | 0.231732000  |
| 8 | -0.545761000 | -0.082213000 | 1.242553000  |
| 6 | 0.570187000  | 1.415689000  | -0.251866000 |
| 1 | 0.792538000  | 1.416784000  | -1.319718000 |
| 1 | -0.226257000 | 2.124461000  | -0.025215000 |
| 1 | 1.470188000  | 1.709336000  | 0.299112000  |
| 6 | 1.061772000  | -1.106264000 | -0.203922000 |
| 1 | 1.253251000  | -1.076863000 | -1.277503000 |
| 1 | 2.012672000  | -0.998888000 | 0.328272000  |
| 1 | 0.593895000  | -2.048392000 | 0.077805000  |
| 8 | -1.290647000 | -0.329862000 | -0.796360000 |
| 1 | -2.017618000 | 0.087998000  | -0.307962000 |

**TS4a**

|   |              |              |             |
|---|--------------|--------------|-------------|
| 6 | 0.176741000  | -0.156622000 | 0.163313000 |
| 8 | -0.192877000 | -0.481568000 | 1.297663000 |

**Hydrogen-abstraction reactions of methyl ketones,  $\text{H}_3\text{COCH}_3\text{-(CH}_3\text{)}_x$ ,  $x=0-2$ , by  $\cdot\text{OH}$ ;** Chong-Wen Zhou  $\text{C}^3$

|   |              |              |              |
|---|--------------|--------------|--------------|
| 6 | 1.157434000  | 0.988308000  | -0.073639000 |
| 1 | 0.879699000  | 1.845879000  | 0.537879000  |
| 1 | 2.137427000  | 0.623387000  | 0.244545000  |
| 1 | 1.208798000  | 1.260537000  | -1.127834000 |
| 6 | -1.443895000 | 0.642079000  | -0.380089000 |
| 1 | -1.604851000 | 1.466218000  | 0.305157000  |
| 1 | -1.182673000 | 0.910174000  | -1.399361000 |
| 1 | -2.157865000 | -0.168198000 | -0.287277000 |
| 8 | 0.364287000  | -1.125050000 | -0.812322000 |
| 1 | 0.006501000  | -1.927647000 | -0.413347000 |

**TS5a**

|   |              |              |              |
|---|--------------|--------------|--------------|
| 6 | 0.925976000  | -0.221806000 | -0.021071000 |
| 8 | 1.411136000  | -1.303385000 | 0.012644000  |
| 6 | -0.879540000 | -0.020054000 | -0.085090000 |
| 1 | -0.839378000 | 0.882027000  | -0.682270000 |
| 1 | -0.979676000 | -0.984838000 | -0.565074000 |
| 1 | -0.836602000 | 0.059403000  | 0.999067000  |
| 6 | 1.637030000  | 1.112716000  | 0.036073000  |
| 1 | 1.521561000  | 1.606002000  | -0.932906000 |
| 1 | 1.164385000  | 1.742682000  | 0.792757000  |
| 1 | 2.694332000  | 0.959933000  | 0.258276000  |
| 8 | -2.649775000 | 0.191861000  | -0.003744000 |
| 1 | -2.916309000 | -0.598149000 | 0.479486000  |

**RC1b**

|   |              |              |              |
|---|--------------|--------------|--------------|
| 6 | -0.160019000 | 0.267742000  | -0.066866000 |
| 8 | 0.303953000  | -0.859372000 | -0.159613000 |
| 6 | 0.737745000  | 1.488295000  | -0.008461000 |
| 1 | 1.178964000  | 1.541179000  | 0.992416000  |
| 1 | 1.555548000  | 1.379691000  | -0.724071000 |
| 1 | 0.190159000  | 2.412677000  | -0.200948000 |
| 6 | -1.652936000 | 0.504156000  | 0.021410000  |
| 1 | -1.831887000 | 1.137285000  | 0.900659000  |
| 1 | -1.930840000 | 1.120949000  | -0.844015000 |
| 6 | -2.470221000 | -0.779640000 | 0.076119000  |
| 1 | -3.538086000 | -0.554033000 | 0.128817000  |
| 1 | -2.283114000 | -1.390374000 | -0.809318000 |
| 1 | -2.194386000 | -1.373670000 | 0.950111000  |
| 8 | 3.180648000  | -0.669635000 | 0.096969000  |
| 1 | 2.249409000  | -0.924964000 | -0.025715000 |

**RC2b**

|   |              |              |              |
|---|--------------|--------------|--------------|
| 6 | -0.858410000 | -0.310055000 | -0.022936000 |
| 8 | 0.089330000  | -1.028341000 | -0.300522000 |

**Hydrogen-abstraction reactions of methyl ketones, H<sub>3</sub>COCH<sub>3-x</sub>(CH<sub>3</sub>)<sub>x</sub>, x=0-2, by ·OH;** Chong-Wen Zhou C<sup>3</sup>

|   |              |              |              |
|---|--------------|--------------|--------------|
| 6 | -2.263383000 | -0.865580000 | 0.063437000  |
| 1 | -2.819094000 | -0.555115000 | -0.828186000 |
| 1 | -2.231750000 | -1.954471000 | 0.106650000  |
| 1 | -2.787186000 | -0.460981000 | 0.934041000  |
| 6 | -0.704275000 | 1.174834000  | 0.249426000  |
| 1 | -1.548385000 | 1.695848000  | -0.218392000 |
| 1 | -0.840000000 | 1.304357000  | 1.332421000  |
| 6 | 0.632884000  | 1.749731000  | -0.203968000 |
| 1 | 0.691309000  | 2.814428000  | 0.034141000  |
| 1 | 1.464276000  | 1.237252000  | 0.280135000  |
| 1 | 0.752832000  | 1.631567000  | -1.284210000 |
| 8 | 2.965942000  | -0.877308000 | 0.200075000  |
| 1 | 2.034926000  | -0.961272000 | -0.068776000 |

**TS1b**

|   |              |              |              |
|---|--------------|--------------|--------------|
| 6 | 0.091652000  | 0.097398000  | 0.103934000  |
| 8 | -0.111817000 | -1.095364000 | 0.258999000  |
| 6 | -1.030213000 | 1.104966000  | 0.195040000  |
| 1 | -0.902788000 | 1.977390000  | -0.447955000 |
| 1 | -2.048034000 | 0.535968000  | -0.151641000 |
| 1 | -1.207757000 | 1.398118000  | 1.232241000  |
| 6 | 1.478531000  | 0.649219000  | -0.164014000 |
| 1 | 1.447041000  | 1.119094000  | -1.156344000 |
| 1 | 1.654761000  | 1.468806000  | 0.544484000  |
| 6 | 2.572539000  | -0.408292000 | -0.085530000 |
| 1 | 3.549489000  | 0.032778000  | -0.297851000 |
| 1 | 2.600382000  | -0.858601000 | 0.909141000  |
| 1 | 2.382953000  | -1.208020000 | -0.804001000 |
| 8 | -2.875689000 | -0.407443000 | -0.273182000 |
| 1 | -2.251052000 | -1.102828000 | -0.011185000 |

**TS2b**

|   |              |              |              |
|---|--------------|--------------|--------------|
| 6 | -0.214046000 | 0.653554000  | 0.089343000  |
| 8 | -0.792363000 | 1.484335000  | -0.573359000 |
| 6 | 1.214664000  | 0.862113000  | 0.548998000  |
| 1 | 1.846010000  | 0.079373000  | -0.101278000 |
| 1 | 1.591522000  | 1.853648000  | 0.299341000  |
| 1 | 1.367954000  | 0.597108000  | 1.596854000  |
| 6 | -0.845030000 | -0.666787000 | 0.495701000  |
| 1 | -0.131568000 | -1.457552000 | 0.236994000  |
| 1 | -0.917406000 | -0.666805000 | 1.591939000  |
| 6 | -2.207149000 | -0.895007000 | -0.146626000 |
| 1 | -2.632993000 | -1.847292000 | 0.179276000  |
| 1 | -2.895715000 | -0.090470000 | 0.118957000  |
| 1 | -2.118116000 | -0.905957000 | -1.235107000 |

**Hydrogen-abstraction reactions of methyl ketones,  $\text{H}_3\text{COCH}_{3-x}(\text{CH}_3)_x$ ,  $x=0-2$ , by  $\cdot\text{OH}$ ;** Chong-Wen Zhou  $\text{C}^3$

|   |             |              |              |
|---|-------------|--------------|--------------|
| 8 | 2.450766000 | -0.994306000 | -0.537390000 |
| 1 | 2.932451000 | -1.205525000 | 0.274525000  |

**TS3b**

|   |              |              |              |
|---|--------------|--------------|--------------|
| 6 | -0.752819000 | -0.363113000 | 0.063734000  |
| 8 | -0.836579000 | -1.017088000 | 1.085540000  |
| 6 | -1.928069000 | 0.375695000  | -0.538034000 |
| 1 | -2.166241000 | -0.046632000 | -1.519668000 |
| 1 | -2.793487000 | 0.293337000  | 0.119904000  |
| 1 | -1.654905000 | 1.425215000  | -0.680833000 |
| 6 | 0.571957000  | -0.195257000 | -0.652895000 |
| 1 | 0.439016000  | -0.102097000 | -1.735362000 |
| 1 | 0.893480000  | 0.902355000  | -0.343183000 |
| 6 | 1.653031000  | -1.172685000 | -0.240558000 |
| 1 | 2.609543000  | -0.914007000 | -0.700149000 |
| 1 | 1.764921000  | -1.179214000 | 0.845069000  |
| 1 | 1.380627000  | -2.187584000 | -0.546866000 |
| 8 | 0.999608000  | 2.053881000  | 0.356207000  |
| 1 | 0.958202000  | 1.646440000  | 1.233637000  |

**TS4b**

|   |              |              |              |
|---|--------------|--------------|--------------|
| 6 | 1.306622000  | 0.103490000  | -0.041533000 |
| 8 | 1.542668000  | 1.293524000  | -0.140428000 |
| 6 | 2.406748000  | -0.939154000 | -0.002950000 |
| 1 | 2.161564000  | -1.787794000 | -0.647936000 |
| 1 | 3.352068000  | -0.489084000 | -0.307734000 |
| 1 | 2.500695000  | -1.319187000 | 1.020120000  |
| 6 | -0.118048000 | -0.427200000 | 0.058538000  |
| 1 | -0.323661000 | -0.997157000 | -0.856635000 |
| 1 | -0.164899000 | -1.153848000 | 0.878299000  |
| 6 | -1.143229000 | 0.672068000  | 0.239456000  |
| 1 | -2.208226000 | 0.145491000  | 0.253147000  |
| 1 | -1.060415000 | 1.189623000  | 1.196693000  |
| 1 | -1.132541000 | 1.392048000  | -0.579001000 |
| 8 | -3.323870000 | -0.488459000 | -0.072764000 |
| 1 | -3.587527000 | 0.124161000  | -0.772484000 |

**TS5b**

|   |             |              |              |
|---|-------------|--------------|--------------|
| 6 | 0.905945000 | -0.165067000 | 0.075179000  |
| 8 | 0.396735000 | -1.155299000 | 0.573125000  |
| 6 | 2.383109000 | -0.109871000 | -0.249344000 |
| 1 | 2.885062000 | 0.521020000  | 0.492351000  |
| 1 | 2.808613000 | -1.113059000 | -0.216344000 |
| 1 | 2.546048000 | 0.344075000  | -1.231022000 |
| 6 | 0.105209000 | 1.086137000  | -0.249253000 |

**Hydrogen-abstraction reactions of methyl ketones,  $\text{H}_3\text{COCH}_3\text{-(CH}_3\text{)}_x$ ,  $x=0-2$ , by  $\cdot\text{OH}$ ;** Chong-Wen Zhou  $\text{C}^3$

|   |              |              |              |
|---|--------------|--------------|--------------|
| 1 | 0.715460000  | 1.959503000  | 0.016793000  |
| 1 | -0.005012000 | 1.115226000  | -1.341550000 |
| 6 | -1.252546000 | 1.137814000  | 0.419614000  |
| 1 | -1.811671000 | 2.043248000  | 0.177643000  |
| 1 | -1.924951000 | 0.247527000  | -0.022717000 |
| 1 | -1.208149000 | 0.973614000  | 1.496905000  |
| 8 | -2.304443000 | -0.895229000 | -0.486765000 |
| 1 | -1.594035000 | -1.381011000 | -0.040109000 |

**RC1c**

|   |              |              |              |
|---|--------------|--------------|--------------|
| 6 | 0.126699000  | 0.037188000  | -0.256417000 |
| 8 | 0.721977000  | -0.973363000 | 0.091727000  |
| 6 | 0.883888000  | 1.309322000  | -0.592523000 |
| 1 | 1.285614000  | 1.735207000  | 0.332237000  |
| 1 | 1.733040000  | 1.059769000  | -1.233143000 |
| 1 | 0.254449000  | 2.052684000  | -1.084017000 |
| 6 | -1.389147000 | 0.080313000  | -0.322443000 |
| 1 | -1.652394000 | 0.512236000  | -1.298129000 |
| 6 | -2.001548000 | -1.308589000 | -0.184969000 |
| 1 | -1.742272000 | -1.741946000 | 0.784442000  |
| 1 | -3.091051000 | -1.249886000 | -0.263680000 |
| 1 | -1.629041000 | -1.982621000 | -0.960330000 |
| 6 | -1.899223000 | 1.035056000  | 0.771338000  |
| 1 | -1.493495000 | 2.044730000  | 0.661471000  |
| 1 | -2.989950000 | 1.100964000  | 0.727469000  |
| 1 | -1.620185000 | 0.655298000  | 1.759759000  |
| 8 | 3.525977000  | -0.325075000 | 0.379052000  |
| 1 | 2.637648000  | -0.718668000 | 0.317770000  |

**RC2c**

|   |              |              |              |
|---|--------------|--------------|--------------|
| 6 | 0.555897000  | -0.712649000 | -0.215886000 |
| 8 | -0.544838000 | -1.243678000 | -0.207484000 |
| 6 | 1.806703000  | -1.544883000 | -0.007354000 |
| 1 | 2.013780000  | -1.600583000 | 1.066788000  |
| 1 | 1.628620000  | -2.557447000 | -0.372442000 |
| 1 | 2.677786000  | -1.106387000 | -0.499364000 |
| 6 | 0.738715000  | 0.787552000  | -0.380758000 |
| 1 | 1.493829000  | 0.925621000  | -1.167262000 |
| 6 | -0.557188000 | 1.482633000  | -0.783054000 |
| 1 | -1.318350000 | 1.363365000  | -0.009614000 |
| 1 | -0.377340000 | 2.550804000  | -0.934657000 |
| 1 | -0.955920000 | 1.062728000  | -1.710515000 |
| 6 | 1.309437000  | 1.366195000  | 0.925925000  |
| 1 | 2.275817000  | 0.925577000  | 1.186278000  |
| 1 | 1.446066000  | 2.446350000  | 0.823566000  |

**Hydrogen-abstraction reactions of methyl ketones, H<sub>3</sub>COCH<sub>3-x</sub>(CH<sub>3</sub>)<sub>x</sub>, x=0-2, by ·OH;** Chong-Wen Zhou C<sup>3</sup>

|   |              |              |             |
|---|--------------|--------------|-------------|
| 1 | 0.611809000  | 1.189451000  | 1.751368000 |
| 8 | -3.233923000 | -0.353874000 | 0.514612000 |
| 1 | -2.387384000 | -0.692147000 | 0.175590000 |

**TS1c**

|   |              |              |              |
|---|--------------|--------------|--------------|
| 6 | 0.189724000  | -0.087203000 | 0.046714000  |
| 8 | 0.573124000  | -1.109459000 | 0.592801000  |
| 6 | 1.129726000  | 1.078834000  | -0.161461000 |
| 1 | 1.228359000  | 1.677021000  | 0.746787000  |
| 1 | 2.233709000  | 0.602004000  | -0.338286000 |
| 1 | 0.897781000  | 1.700946000  | -1.027349000 |
| 6 | -1.247570000 | 0.091191000  | -0.415289000 |
| 1 | -1.198495000 | 0.382789000  | -1.474293000 |
| 6 | -2.045911000 | -1.199416000 | -0.270108000 |
| 1 | -2.098529000 | -1.494907000 | 0.781027000  |
| 1 | -3.063143000 | -1.057680000 | -0.646704000 |
| 1 | -1.576076000 | -2.017137000 | -0.821422000 |
| 6 | -1.890605000 | 1.250182000  | 0.364203000  |
| 1 | -1.355314000 | 2.192568000  | 0.217623000  |
| 1 | -2.923797000 | 1.392239000  | 0.035028000  |
| 1 | -1.903470000 | 1.022189000  | 1.435327000  |
| 8 | 3.208349000  | -0.184720000 | -0.169241000 |
| 1 | 2.695005000  | -0.848132000 | 0.319423000  |

**TS2c**

|   |              |              |              |
|---|--------------|--------------|--------------|
| 6 | 0.096366000  | 0.843728000  | 0.117346000  |
| 8 | 0.689731000  | 1.894353000  | -0.028765000 |
| 6 | -1.318526000 | 0.837451000  | 0.664504000  |
| 1 | -1.358732000 | 0.511082000  | 1.706957000  |
| 1 | -1.796796000 | 1.808058000  | 0.534223000  |
| 1 | -1.959580000 | 0.003128000  | 0.095488000  |
| 6 | 0.711280000  | -0.505025000 | -0.227255000 |
| 1 | 0.091247000  | -0.912583000 | -1.037055000 |
| 6 | 2.152032000  | -0.346210000 | -0.699713000 |
| 1 | 2.775246000  | 0.049263000  | 0.107609000  |
| 1 | 2.555473000  | -1.314395000 | -1.010430000 |
| 1 | 2.216960000  | 0.350548000  | -1.538042000 |
| 6 | 0.596819000  | -1.470231000 | 0.962136000  |
| 1 | -0.444911000 | -1.687422000 | 1.210816000  |
| 1 | 1.085629000  | -2.417161000 | 0.716295000  |
| 1 | 1.092800000  | -1.054070000 | 1.846205000  |
| 8 | -2.565230000 | -0.809409000 | -0.731464000 |
| 1 | -2.681164000 | -0.174282000 | -1.452344000 |

**TS3c**

**Hydrogen-abstraction reactions of methyl ketones,  $\text{H}_3\text{COCH}_3\text{-(CH}_3\text{)}_x$ ,  $x=0-2$ , by  $\cdot\text{OH}$ ;** Chong-Wen Zhou  $\text{C}^3$

|   |              |              |              |
|---|--------------|--------------|--------------|
| 6 | 0.919931000  | -0.310198000 | -0.168986000 |
| 8 | 1.322527000  | -1.075116000 | -1.025808000 |
| 6 | 1.853646000  | 0.623677000  | 0.575622000  |
| 1 | 1.997236000  | 0.264811000  | 1.599852000  |
| 1 | 2.817624000  | 0.641408000  | 0.065813000  |
| 1 | 1.423351000  | 1.627344000  | 0.622459000  |
| 6 | -0.559758000 | -0.226988000 | 0.180115000  |
| 1 | -0.854364000 | 0.847784000  | -0.177301000 |
| 6 | -1.400620000 | -1.230889000 | -0.587462000 |
| 1 | -1.160630000 | -2.247219000 | -0.257160000 |
| 1 | -2.464412000 | -1.047534000 | -0.413079000 |
| 1 | -1.196397000 | -1.179933000 | -1.658722000 |
| 6 | -0.832126000 | -0.224978000 | 1.682200000  |
| 1 | -0.331367000 | 0.602469000  | 2.189869000  |
| 1 | -1.906171000 | -0.136719000 | 1.866987000  |
| 1 | -0.486940000 | -1.165840000 | 2.128099000  |
| 8 | -0.949526000 | 2.101319000  | -0.773485000 |
| 1 | -0.708374000 | 1.800064000  | -1.661403000 |

**TS4c**

|   |              |              |              |
|---|--------------|--------------|--------------|
| 6 | 0.539358000  | -0.705754000 | 0.105421000  |
| 8 | -0.216932000 | -1.340367000 | 0.822745000  |
| 6 | 1.835960000  | -1.316409000 | -0.390113000 |
| 1 | 2.653943000  | -1.005588000 | 0.268367000  |
| 1 | 1.754194000  | -2.403403000 | -0.354851000 |
| 1 | 2.075256000  | -0.982690000 | -1.403219000 |
| 6 | 0.248488000  | 0.731405000  | -0.312859000 |
| 1 | 0.175469000  | 0.721123000  | -1.409724000 |
| 6 | -1.056865000 | 1.235686000  | 0.268189000  |
| 1 | -1.094574000 | 1.159599000  | 1.356318000  |
| 1 | -1.303606000 | 2.245090000  | -0.069076000 |
| 1 | -1.952118000 | 0.554645000  | -0.143033000 |
| 6 | 1.423826000  | 1.645563000  | 0.080104000  |
| 1 | 2.355146000  | 1.348765000  | -0.409234000 |
| 1 | 1.204539000  | 2.677041000  | -0.208931000 |
| 1 | 1.578322000  | 1.622303000  | 1.164009000  |
| 8 | -2.677912000 | -0.460605000 | -0.498027000 |
| 1 | -2.232415000 | -1.072056000 | 0.107185000  |

**TS5c**

|   |             |              |              |
|---|-------------|--------------|--------------|
| 6 | 1.345783000 | -0.306331000 | -0.092474000 |
| 8 | 1.638474000 | -1.419629000 | 0.306614000  |
| 6 | 2.412394000 | 0.693532000  | -0.503423000 |
| 1 | 2.624659000 | 1.356785000  | 0.341688000  |
| 1 | 3.325542000 | 0.155062000  | -0.760863000 |



**Hydrogen-abstraction reactions of methyl ketones, H<sub>3</sub>COCH<sub>3-x</sub>(CH<sub>3</sub>)<sub>x</sub>, x=0-2, by ·OH;** Chong-Wen Zhou C<sup>3</sup>

|   |              |              |              |
|---|--------------|--------------|--------------|
| 1 | 2.083392000  | 1.313538000  | -1.341668000 |
| 6 | -0.105132000 | 0.161494000  | -0.177403000 |
| 1 | -0.287403000 | 0.429952000  | -1.228260000 |
| 6 | -1.054827000 | -0.948243000 | 0.230598000  |
| 1 | -0.970367000 | -1.207598000 | 1.288363000  |
| 1 | -2.160341000 | -0.534406000 | 0.111152000  |
| 1 | -0.968387000 | -1.845305000 | -0.384207000 |
| 6 | -0.318850000 | 1.423011000  | 0.673103000  |
| 1 | 0.294692000  | 2.258512000  | 0.326157000  |
| 1 | -1.369094000 | 1.718404000  | 0.620136000  |
| 1 | -0.067496000 | 1.219686000  | 1.719778000  |
| 8 | -3.263829000 | 0.073098000  | -0.334924000 |
| 1 | -3.178553000 | -0.233153000 | -1.248203000 |

**TS6c**

|   |              |              |              |
|---|--------------|--------------|--------------|
| 6 | 0.951891000  | -0.415717000 | 0.062227000  |
| 8 | 0.427915000  | -1.489842000 | -0.189402000 |
| 6 | 2.454991000  | -0.247492000 | 0.043421000  |
| 1 | 2.923525000  | -1.113236000 | -0.425444000 |
| 1 | 2.735213000  | 0.671419000  | -0.479476000 |
| 1 | 2.808903000  | -0.155824000 | 1.076461000  |
| 6 | 0.136049000  | 0.828590000  | 0.389993000  |
| 1 | 0.766047000  | 1.484846000  | 1.006852000  |
| 6 | -0.181518000 | 1.558906000  | -0.927657000 |
| 1 | -0.838954000 | 0.932874000  | -1.535144000 |
| 1 | -0.698036000 | 2.499801000  | -0.716387000 |
| 1 | 0.726777000  | 1.787018000  | -1.493613000 |
| 6 | -1.134515000 | 0.499230000  | 1.154386000  |
| 1 | -0.971923000 | -0.136667000 | 2.026780000  |
| 1 | -1.704061000 | 1.393760000  | 1.417831000  |
| 1 | -1.878586000 | -0.116293000 | 0.435857000  |
| 8 | -2.384512000 | -0.903585000 | -0.453206000 |
| 1 | -1.577526000 | -1.441383000 | -0.507072000 |

**TS7c**

|   |              |              |              |
|---|--------------|--------------|--------------|
| 6 | 0.739418000  | 0.819230000  | -0.037173000 |
| 8 | 1.859738000  | 1.180765000  | 0.276120000  |
| 6 | -0.412284000 | 1.805839000  | -0.110820000 |
| 1 | -0.932873000 | 1.802683000  | 0.853719000  |
| 1 | -0.008231000 | 2.805713000  | -0.275807000 |
| 1 | -1.136907000 | 1.537739000  | -0.880539000 |
| 6 | 0.433317000  | -0.645113000 | -0.346357000 |
| 1 | 0.077574000  | -0.680712000 | -1.386235000 |
| 6 | 1.687164000  | -1.508605000 | -0.208096000 |
| 1 | 2.037197000  | -1.506971000 | 0.827691000  |

**Hydrogen-abstraction reactions of methyl ketones,  $\text{H}_3\text{COCH}_3\text{-(CH}_3\text{)}_x$ ,  $x=0-2$ , by  $\cdot\text{OH}$ ;** Chong-Wen Zhou  $\text{C}^3$

|   |              |              |              |
|---|--------------|--------------|--------------|
| 1 | 1.472392000  | -2.538559000 | -0.507013000 |
| 1 | 2.494955000  | -1.117625000 | -0.830191000 |
| 6 | -0.691670000 | -1.168348000 | 0.545274000  |
| 1 | -1.733219000 | -0.734885000 | 0.181101000  |
| 1 | -0.823958000 | -2.247979000 | 0.440983000  |
| 1 | -0.565491000 | -0.905987000 | 1.599927000  |
| 8 | -2.905461000 | -0.248211000 | -0.229690000 |
| 1 | -3.051331000 | 0.308124000  | 0.547954000  |

**Variflex input for channel 1b in EMK + OH with USTTSP:**

! Multiwell Test Calculation and Sample Input

\*Title

& EMK + OH\_TS1 (G3\_MP2) E/J Resolved Test Case

\*CalculationType

AssociationP

NeutralP

EJResP

HighPresP

ChannelsD

1

\*CalculationRanges

! Range of temperatures

TRangeP ListDQ

11

ValuesL

500

600

700

800

900

1000

1200

1400

1600

1800

2000

**Hydrogen-abstraction reactions of methyl ketones,  $\text{H}_3\text{COCH}_{3-x}(\text{CH}_3)_x$ ,  $x=0-2$ , by  $\cdot\text{OH}$ ;** Chong-Wen Zhou  $\text{C}^3$

DZeroRangeP StepDQ  
10982.15, 100.0, 1

\*ConvolutionRanges

ERangeP StepDQ  
-10982.15, 150., 800

JRangeP StepDQ  
1, 10, 25

\*Complex !PC1

!\*\*\*\*\* Structure Input \*\*\*\*\*

! The following lines are typical input for the molecular structure  
! input module, in this case giving input for the complex.

NearProlateP !Molecule type

NElecStatesD !Number of states

1

ElecStatesL !List of electronic state degeneracies and energies

2, 0.0

NModesD !Number of modes, correction factor

39, 0.9496

ModesL !List of mode frequencies

49.4, 64.6, 114.8, 149.3, 183.9, 218.0, 279.0, 315.9, 351.1, 421.9,  
513.5, 608.6,  
676.2, 682.0, 797.1, 824.5, 980.8, 1029.9, 1095.4, 1128.7, 1231.0,  
1292.6, 1402.2,  
1434.5, 1466.0, 1483.6, 1514.6, 1520.2, 1707.9, 2051.6, 3071.6, 3094.3,  
3117.8,  
3185.2, 3192.5, 3196.9, 3335.2, 3772.8, 3964.0

SigRotD !Rotational symmetry number for molecule

1.0

RotConstP

MassD

89.0

RotConstD !Rotational constants (cm-1)

0.2267, 0.0500, 0.0433

Hydrogen-abstraction reactions of methyl ketones,  $\text{H}_3\text{COCH}_{3-x}(\text{CH}_3)_x$ ,  $x=0-2$ , by  $\cdot\text{OH}$ ; Chong-Wen Zhou  $\text{C}^3$

!\*\*\*\*\*

EVCStepD ! step size for complex density of states  
1.0

!End of complex input

\*Channel1

\*Fragments

!\*\*\*\*\*

! Structure data for OH fragment

!\*\*\*\*\*

LinearP

NElecStatesD

2

ElecStatesL

2, 0.0

2, 137.

NModesD

1, 0.9496

ModesL

3857.1

SigRotD

1.0

CartesianP

NAtomsD

2

PositionL

1.00000 .000000 .000000 .917779

15.9949 .000000 .000000 -.573795E-01

!\*\*\*\*\*

! Structure data for EMK fragment

!\*\*\*\*\*

NearprolateP

NElecStatesD

1

ElecStatesL

1, 0.0

NModesD

Hydrogen-abstraction reactions of methyl ketones,  $\text{H}_3\text{COCH}_{3-x}(\text{CH}_3)_x$ ,  $x=0-2$ , by  $\cdot\text{OH}$ ; Chong-Wen Zhou  $\text{C}^3$

32, 0.9496

ModesL

68.58, 108.71, 252.3, 400.7, 469.5, 595.5, 762.7, 782.0, 955.8, 965.8,  
1019.1, 1124.8, 1139.0, 1205.2, 1296.6, 1381.5, 1406.8, 1432.7, 1471.8,  
1487.8, 1499.1, 1516.3, 1520.6, 1781.4, 3066.8, 3077.9, 3090.3, 3112.4,  
3161.5, 3179.2, 3187.3, 3202.2

HindRotorD

1

!HindTypeD !Methyl 108.71

!1

!HindParL

!5.6 153.89 3

HindTypeD ! Methyl 221.20

1

HindParL

5.6 860.38 3

SigRotD

1.00

CartesianP

NAtomsD

13

PositionL

|         |              |              |          |
|---------|--------------|--------------|----------|
| 16.0000 | .214588E-01  | 1.30830      | .422583  |
| 12.0000 | .206906E-01  | .937513E-01  | .505941  |
| 12.0000 | -.456053E-01 | -.619781     | 1.84341  |
| 1.00000 | .668532      | -1.44746     | 1.88033  |
| 1.00000 | .150492      | .881401E-01  | 2.64933  |
| 1.00000 | -1.04777     | -1.04324     | 1.97170  |
| 12.0000 | .740843E-01  | -.797903     | -.725669 |
| 1.00000 | 1.02695      | -1.34301     | -.687838 |
| 1.00000 | -.707645     | -1.56179     | -.626983 |
| 12.0000 | -.612228E-01 | -.227709E-01 | -2.03039 |
| 1.00000 | .143733E-02  | -.695476     | -2.88957 |
| 1.00000 | -1.01819     | .502880      | -2.06673 |
| 1.00000 | .727492      | .727620      | -2.11105 |

\*TransState

USTTSP

VibAdiabaticP

StepscaleD

1.0 40 80

**Hydrogen-abstraction reactions of methyl ketones,  $\text{H}_3\text{COCH}_{3-x}(\text{CH}_3)_x$ ,  $x=0-2$ , by  $\cdot\text{OH}$ ;** Chong-Wen Zhou  $\text{C}^3$

!StepSizeD

!2.0 10.0

ElecAdiabaticP

NElecStatesD

1

ElecStatesL

2 0

VRCP

Bondrefp

RRangeP TotalPPSetsPQ StepDQ

2.3 0.2 30

NPPSetsd

1

PPSetsL

0 0 0 0 0 0

MinEPathD

-100, 2000, 2

IntegrationParP

MonteCarloEJD

-5000, 5000, 2

SigRotD

1.0

\*Potential

TerminalAtom1p

CentralAtom2p

VStretchP

!De=8.03 kcal/mol (without ZPE )

MorseD

2808.4925

1.18

1.951

! De, Beta, Re

AnisotropicP

PowerD

2

onesided1P

**Hydrogen-abstraction reactions of methyl ketones,  $\text{H}_3\text{COCH}_{3-x}(\text{CH}_3)_x$ ,  $x=0-2$ , by  $\cdot\text{OH}$ ;** Chong-Wen Zhou  $\text{C}^3$

```
onesided2P
Theta1D
  162.51
Theta2D
  113.84

*SecondTS          !ts1_G3
  NElecStatesD
    1
  ElecStatesL
    2, 0.0

RRHOP

NearProlateP

NModesD
  37, 0.9496
ModesL
  38.7, 89.33, 147.8, 254.7, 294.6, 368.7, 436.3, 477.8, 593.9,
  727.7, 762.5, 821.6, 930.5, 973.3, 1018.7, 1030.3, 1129.0, 1132.4,
  1229.0,
  1240.7, 1298.8, 1391.8, 1433.3, 1456.1, 1467.8, 1516.1, 1520.5, 1561.5,
  1783.6,
  3068.5, 3092.2, 3113.0, 3125.6, 3182.8, 3188.7, 3211.1, 3781.3

HindRotorD
  1

HindTypeD ! Methyl 223.70, 2.5 kal/mol
  1
HindParL
  5.49 874.38 3

!HindTypeD ! Ethyl 89.33
!4
!HindParL
!0.97, 3.07, -1953.64, 1924.98

SigRotD
  1.0

RotConstP
MassD
  89.0
```

**Hydrogen-abstraction reactions of methyl ketones,  $\text{H}_3\text{COCH}_3\text{-(CH}_3\text{)}_x$ ,  $x=0-2$ , by  $\cdot\text{OH}$ ;** Chong-Wen Zhou  $\text{C}^3$

```
RotConstD
0.2600, 0.0567, 0.0467
EckTunD
2101.1, 2588.15, 10142.75 !G3

TSEnergyD
734.475 !2.1*349.64

*ThirdTS !RC1
NElecStatesD
1
ElecStatesL
2, 0.0

RRHOP

NearProlateP !Molecule type

NModesD !Number of modes, correction factor
39, 0.9496
ModesL !List of mode frequencies
28.5, 49.6, 85.3, 123.8, 146.0, 224.7, 270.5, 411.8, 473.3, 501.5,
549.1,
597.5, 762.7, 788.1, 962.7, 995.9, 1021.1, 1123.8, 1137.5, 1208.8,
1297.8,
1390.3, 1409.9, 1434.5, 1466.5, 1491.9, 1510.4, 1516.2, 1520.9, 1768.9,
3066.5, 3084.0, 3092.3, 3110.0, 3172.3, 3182.9, 3187.4, 3198.2, 3727.2

SigRotD
1.0

RotConstP
MassD
89.0

RotConstD !Rotational constants (cm-1)
0.2100, 0.0533, 0.0433

TSEnergyD
-1853.675 !-5.3*349.64

!End of channel 1 input

*End
```



**Hydrogen-abstraction reactions of methyl ketones,  $H_3COCH_{3-x}(CH_3)_x$ ,  $x=0-2$ , by  $\cdot OH$ ; Chong-Wen Zhou  $C^3$   
Variflex output for channel 1b in EMK + OH with USTTSP:**

```
*****  
*                                                                 *  
*  VARIFLEX: VERSION 1.00; (July 16, 1999)                       *  
*  S. J. Klippenstein, A. F. Wagner, R. C. Dunbar, *           *  
*  D. M. Wardlaw, and S. H. Robertson                         *  
*                                                                 *  
*****
```

EMK + OH\_TS1 (G3\_MP2) E/J Resolved Test Case

\*\*\*\*\* Calculation Type \*\*\*\*\*

Thermal association rate constants will be evaluated  
for 1 channels in a radical-radical reaction  
The component rates will be evaluated at the E/J resolved level  
for the high stabilization efficiency (high P) limit

\*\*\*\*\* Calculation Ranges \*\*\*\*\*

Temperatures (K)

|         |         |         |         |         |         |
|---------|---------|---------|---------|---------|---------|
| 500.00  | 600.00  | 700.00  | 800.00  | 900.00  | 1000.00 |
| 1200.00 | 1400.00 | 1600.00 | 1800.00 | 2000.00 |         |

D0 values (cm-1)

ranging from 10982.15 to 10982.15 in steps of 100.00

\*\*\*\*\* Convolution Ranges \*\*\*\*\*

Energy values relative to separated fragments (cm-1)

ranging from -10982.15 to 108867.85 in steps of 150.00

The total angular momentum J will

cover the range from 1 to 241 in steps of 10

\*\*\*\*\* Complex Data \*\*\*\*\*

Electronic state degeneracies and energies (cm-1)

2 .00000

Corrected Vibrational frequencies (cm-1)

|       |      |       |       |       |       |       |       |       |
|-------|------|-------|-------|-------|-------|-------|-------|-------|
| 46.9  | 61.3 | 109.0 | 141.8 | 174.6 | 207.0 | 264.9 | 300.0 | 333.4 |
| 400.6 |      |       |       |       |       |       |       |       |

**Hydrogen-abstraction reactions of methyl ketones,  $\text{H}_3\text{COCH}_{3-x}(\text{CH}_3)_x$ ,  $x=0-2$ , by  $\cdot\text{OH}$ ;** Chong-Wen Zhou  $C^3$

487.6 577.9 642.1 647.6 756.9 782.9 931.4 978.0 1040.2  
1071.8  
1169.0 1227.5 1331.5 1362.2 1392.1 1408.8 1438.3 1443.6 1621.8 1948.2  
2916.8 2938.3 2960.7 3024.7 3031.6 3035.8 3167.1 3582.7 3764.2

Zero point energy = 26360. cm-1

Rotational symmetry number is 1.00

The complex is a near prolate top with  
rotational constants of .2267 .5000E-01 .4330E-01 (cm-1)  
and symmetrized rotational constants of .2267 .4665E-01 (cm-1)

vib. step size for complex density of states = 1.00 cm-1

Warning in complex: The complex data is irrelevant since  
a high pressure association is being considered

\*\*\*\*\* Data for fragment 1 of channel 1 \*\*\*\*\*

Electronic state degeneracies and energies (cm-1)

2 .00000  
2 137.00

Corrected Vibrational frequencies (cm-1)

3662.7

Zero point energy = 1831.4 cm-1

Rotational symmetry number is 1.00

Fragment1 is linear with  
a rotational constant of 18.84 (cm-1)

\*\*\*\*\* Data for fragment 2 of channel 1 \*\*\*\*\*

Electronic state degeneracies and energies (cm-1)

1 .00000

Corrected Vibrational frequencies (cm-1)

65.1 103.2 239.6 380.5 445.8 565.5 724.3 742.6 907.6  
917.1  
967.7 1068.1 1081.6 1144.5 1231.3 1311.9 1335.9 1360.5 1397.6 1412.8  
1423.5 1439.9 1444.0 1691.6 2912.2 2922.8 2934.5 2955.5 3002.2 3019.0  
3026.7 3040.8

**Hydrogen-abstraction reactions of methyl ketones,  $\text{H}_3\text{COCH}_{3-x}(\text{CH}_3)_x$ ,  $x=0-2$ , by  $\cdot\text{OH}$ ;** Chong-Wen Zhou  $C^3$

Zero point energy = 23608. cm-1

1mode(s) will be treated as 1-dhindered rotors  
For mode 1 A type 1 treatment with data = 5.600 860.4  
3.000

Rotational symmetry number is 1.00

Fragment2 is a near prolate top with  
rotational constants of .3164 .1207 .9195E-01 (cm-1)

\*\*\*\*\* Orientation tests for each fragment \*\*\*\*\*

Fragment1 is a Linear top

| Mass (g/mol)        | Ref.x (Ang) | Ref.y (Ang) | Ref.z (Ang)  | for fragment |
|---------------------|-------------|-------------|--------------|--------------|
| 1                   |             |             |              |              |
| 1.00000             | .000000     | .000000     | .917779      |              |
| 15.9949             | .000000     | .000000     | -.573795E-01 |              |
| Moments (amu*A**2): | .894980     | .894980     | .000000      |              |

Fragment2 is a prolate Asymmetric top

| Mass (g/mol)        | Ref.x (Ang)  | Ref.y (Ang)  | Ref.z (Ang) | for fragment |
|---------------------|--------------|--------------|-------------|--------------|
| 2                   |              |              |             |              |
| 16.0000             | .214588E-01  | 1.30830      | .422583     |              |
| 12.0000             | .206906E-01  | .937510E-01  | .505941     |              |
| 12.0000             | -.456053E-01 | -.619781     | 1.84341     |              |
| 1.00000             | .668532      | -1.44746     | 1.88033     |              |
| 1.00000             | .150492      | .881398E-01  | 2.64933     |              |
| 1.00000             | -1.04777     | -1.04324     | 1.97170     |              |
| 12.0000             | .740843E-01  | -.797903     | -.725669    |              |
| 1.00000             | 1.02695      | -1.34301     | -.687838    |              |
| 1.00000             | -.707645     | -1.56179     | -.626983    |              |
| 12.0000             | -.612228E-01 | -.227712E-01 | -2.03039    |              |
| 1.00000             | .143732E-02  | -.695476     | -2.88957    |              |
| 1.00000             | -1.01819     | .502880      | -2.06673    |              |
| 1.00000             | .727492      | .727620      | -2.11105    |              |
| Moments (amu*A**2): | 183.329      | 139.719      | 53.2846     |              |

\*\*\*\*\* Transition State Treatment Data \*\*\*\*\*

An effective number of states calculation using  
the inverse of  $1/N_{\text{inner}} + 1/N_{\text{outer}} - 1/N_{\text{max}}$  will be performed

An adiabatic treatment of the conserved mode vibrational  
contribution to the transition state partition functions will

**Hydrogen-abstraction reactions of methyl ketones,  $\text{H}_3\text{COCH}_{3-x}(\text{CH}_3)_x$ ,  $x=0-2$ , by  $\cdot\text{OH}$ ;** Chong-Wen Zhou  $\text{C}^3$   
be performed

The vibrational step size for the evaluation of the  
number of states = 1.00  $\text{cm}^{-1}$   
The transitional mode number of states will be evaluated  
on a grid of 80 points starting at 40.000  $\text{cm}^{-1}$   
and with the step size increasing with energy  
Interpolation of these values will provide the  
transitional mode numbers for the vibrational grid

An adiabatic treatment of the electronic state contributions  
will be performed  
for all 1 electronic states in the transition state region

For effective TS location 1  
of electronic state 1 in channel 1  
the number of states will be evaluated according to  
Variable Reaction Coordinate Flexible Transition State Theory

\*\*\*\*\* VRC data \*\*\*\*\*

The pivot points are defined relative to the bonding atoms

A direct product of the following pivot point separations (A)

ranging from 2.30 to 8.10 in steps of .20  
with the following vectors of pivot point definitions

| d_1  | alpha_1 | beta_1 | d_2  | alpha_2 | beta_2 |
|------|---------|--------|------|---------|--------|
| .000 | .000    | .000   | .000 | .000    | .000   |

will be sampled over

2000 configurations will be sampled in the determination of each  
point along the minimum energy path. The initial seed for the random  
number generator used in these determinations is -100

The phase space integrals will be evaluated via Monte Carlo  
integration with

Monte Carlo seed = -5000 # M.C. PTS. = 5000 # per Config. = 2

Rotational symmetry number = 1.0000

\*\*\*\*\* Potential Parameters for Effective TS Location 1  
of Electronic State 1 in Channel 1 \*\*\*\*\*

**Hydrogen-abstraction reactions of methyl ketones,  $\text{H}_3\text{COCH}_{3-x}(\text{CH}_3)_x$ ,  $x=0-2$ , by  $\cdot\text{OH}$ ;** Chong-Wen Zhou  $\text{C}^3$

A Morse potential is used with parameters

De = 2808.49 Beta = 1.1800 Re = 1.95

Using an anisotropic bonding potential

Angular exponent is 2

Fragment 1 has a one-sided bond

Fragment 2 has a one-sided bond

Fragment 1 bond angle is 162.510 deg

Fragment 2 bond angle is 113.840 deg

A statistical treatment of the conserved mode vibrational contribution to the transition state partition functions will be performed

The default step size of 1.00  $\text{cm}^{-1}$  will be used for the convolution of the conserved mode vibrations and the default step size of 50.00  $\text{cm}^{-1}$  will be used for the generation of the transitional mode number of states

A statistical treatment of the electronic state contributions will be performed for all 1 electronic states in the transition state region

For effective TS location 2 of electronic state 1 in channel 1 the number of states will be evaluated according to Rigid Rotor Harmonic Oscillator assumptions for the energetics

\*\*\*\*\* RRHO data \*\*\*\*\*

Corrected Vibrational frequencies ( $\text{cm}^{-1}$ )

36.7 84.8 140.4 241.9 279.8 350.1 414.3 453.7 564.0  
691.0  
724.1 780.2 883.6 924.2 967.4 978.4 1072.1 1075.3 1167.1 1178.2  
1233.3 1321.7 1361.1 1382.7 1393.8 1439.7 1443.9 1482.8 1693.7 2913.8  
2936.4 2956.1 2968.1 3022.4 3028.0 3049.3 3590.7

Zero point energy = 25112.  $\text{cm}^{-1}$

1mode(s) will be treated as 1-dhindered rotors

For mode 1 A type 1 treatment with data = 5.490 874.4  
3.000

**Hydrogen-abstraction reactions of methyl ketones,  $\text{H}_3\text{COCH}_{3-x}(\text{CH}_3)_x$ ,  $x=0-2$ , by  $\cdot\text{OH}$ ;** Chong-Wen Zhou  $C^3$

Rotational symmetry number is 1.00  
The TS is a near prolate top  
rot. constants .26000 .56700E-01 .46700E-01 (cm-1)  
symm. rot. constants .26000 .51700E-01 (cm-1)  
With an Eckart tunneling correction  
for an imaginary barrier frequency of 2101. cm-1  
and with the reactants and products located 2588.  
and .1014E+05  
cm-1 below the barrier

Delta H\_0 for channel 1 TS relative to channel 1 is 734.48 cm-1

A statistical treatment of the conserved mode vibrational  
contribution to the transition state partition functions  
will be performed

The default step size of 1.00 cm-1 will be used for the  
convolution of the conserved mode vibrations  
and the default step size of 50.00 cm-1 will  
be used for the generation of the transitional mode number of states

A statistical treatment of the electronic state contributions  
will be performed  
for all 1 electronic states in the transition state region

For effective TS location 3  
of electronic state 1 in channel 1  
the number of states will be evaluated according to  
Rigid Rotor Harmonic Oscillator assumptions for the energetics

\*\*\*\*\* RRHO data \*\*\*\*\*

Corrected Vibrational frequencies (cm-1)  
27.1 47.1 81.0 117.6 138.6 213.4 256.9 391.0 449.4  
476.2  
521.4 567.4 724.3 748.4 914.2 945.7 969.6 1067.2 1080.2 1147.9  
1232.4 1320.2 1338.8 1362.2 1392.6 1416.7 1434.3 1439.8 1444.2 1679.7  
2911.9 2928.6 2936.4 2953.3 3012.4 3022.5 3026.8 3037.0 3539.3

Zero point energy = 26157. cm-1

Rotational symmetry number is 1.00  
The TS is a near prolate top  
rot. constants .21000 .53300E-01 .43300E-01 (cm-1)

**Hydrogen-abstraction reactions of methyl ketones,  $H_3COCH_{3-x}(CH_3)_x$ ,  $x=0-2$ , by  $\cdot OH$ ;** Chong-Wen Zhou  $C^3$   
symm. rot. constants .21000 .48300E-01 (cm<sup>-1</sup>)

Delta H<sub>0</sub> for channel 1 TS relative to channel 1 is -1853.7 cm<sup>-1</sup>

\*\*\*\*\* End of all input \*\*\*\*\*

\*\*\*\*\* Minimum Energy Path results for:

effective TS location 1 of electronic state 1 in channel 1 \*\*\*\*\*

| rmep (A) | Vmep (cm <sup>-1</sup> ) | R (A) | d1 (A) | Theta1 | Phi1 | d2 (A) | Theta2 | Phi2 |
|----------|--------------------------|-------|--------|--------|------|--------|--------|------|
| 2.300    | -2471.                   | 2.300 | .000   | .00    | .00  | .000   | .00    | .00  |
| 2.500    | -2167.                   | 2.500 | .000   | .00    | .00  | .000   | .00    | .00  |
| 2.700    | -1827.                   | 2.700 | .000   | .00    | .00  | .000   | .00    | .00  |
| 2.900    | -1526.                   | 2.900 | .000   | .00    | .00  | .000   | .00    | .00  |
| 3.100    | -1249.                   | 3.100 | .000   | .00    | .00  | .000   | .00    | .00  |
| 3.300    | -1020.                   | 3.300 | .000   | .00    | .00  | .000   | .00    | .00  |
| 3.500    | -829.1                   | 3.500 | .000   | .00    | .00  | .000   | .00    | .00  |
| 3.700    | -661.8                   | 3.700 | .000   | .00    | .00  | .000   | .00    | .00  |
| 3.900    | -534.1                   | 3.900 | .000   | .00    | .00  | .000   | .00    | .00  |
| 4.100    | -423.8                   | 4.100 | .000   | .00    | .00  | .000   | .00    | .00  |
| 4.300    | -339.0                   | 4.300 | .000   | .00    | .00  | .000   | .00    | .00  |
| 4.500    | -268.9                   | 4.500 | .000   | .00    | .00  | .000   | .00    | .00  |
| 4.700    | -214.8                   | 4.700 | .000   | .00    | .00  | .000   | .00    | .00  |
| 4.900    | -170.3                   | 4.900 | .000   | .00    | .00  | .000   | .00    | .00  |
| 5.100    | -134.2                   | 5.100 | .000   | .00    | .00  | .000   | .00    | .00  |
| 5.300    | -106.7                   | 5.300 | .000   | .00    | .00  | .000   | .00    | .00  |
| 5.500    | -84.38                   | 5.500 | .000   | .00    | .00  | .000   | .00    | .00  |
| 5.700    | -66.18                   | 5.700 | .000   | .00    | .00  | .000   | .00    | .00  |
| 5.900    | -52.89                   | 5.900 | .000   | .00    | .00  | .000   | .00    | .00  |
| 6.100    | -41.71                   | 6.100 | .000   | .00    | .00  | .000   | .00    | .00  |
| 6.300    | -33.02                   | 6.300 | .000   | .00    | .00  | .000   | .00    | .00  |
| 6.500    | -26.04                   | 6.500 | .000   | .00    | .00  | .000   | .00    | .00  |
| 6.700    | -20.61                   | 6.700 | .000   | .00    | .00  | .000   | .00    | .00  |
| 6.900    | -16.31                   | 6.900 | .000   | .00    | .00  | .000   | .00    | .00  |
| 7.100    | -12.85                   | 7.100 | .000   | .00    | .00  | .000   | .00    | .00  |
| 7.300    | -10.11                   | 7.300 | .000   | .00    | .00  | .000   | .00    | .00  |
| 7.500    | -7.988                   | 7.500 | .000   | .00    | .00  | .000   | .00    | .00  |
| 7.700    | -6.349                   | 7.700 | .000   | .00    | .00  | .000   | .00    | .00  |
| 7.900    | -4.976                   | 7.900 | .000   | .00    | .00  | .000   | .00    | .00  |
| 8.100    | -3.962                   | 8.100 | .000   | .00    | .00  | .000   | .00    | .00  |

Note: d1, theta1, and phi1 are the spherical polar coordinates defining the vector from the reference point (either the center-of-mass or the bonding atom) to the pivot point in fragment 1. Similar definitions hold for fragment 2.

**Hydrogen-abstraction reactions of methyl ketones,  $\text{H}_3\text{COCH}_{3-x}(\text{CH}_3)_x$ ,  $x=0-2$ , by  $\cdot\text{OH}$ ;** Chong-Wen Zhou  $C^3$   
Vmep and rmep are the minimum potential and corresponding coordinate for the TS dividing surface defined by R and these pivot point vectors

| rmep (A) | Vmep (cm-1) | R (A) | x1 (A) | y1 (A) | z1 (A) | x2 (A) | y2 (A) | z2 (A) |
|----------|-------------|-------|--------|--------|--------|--------|--------|--------|
| 2.300    | -2471.      | 2.300 | .000   | .000   | .918   | .021   | 1.308  | .423   |
| 2.500    | -2167.      | 2.500 | .000   | .000   | .918   | .021   | 1.308  | .423   |
| 2.700    | -1827.      | 2.700 | .000   | .000   | .918   | .021   | 1.308  | .423   |
| 2.900    | -1526.      | 2.900 | .000   | .000   | .918   | .021   | 1.308  | .423   |
| 3.100    | -1249.      | 3.100 | .000   | .000   | .918   | .021   | 1.308  | .423   |
| 3.300    | -1020.      | 3.300 | .000   | .000   | .918   | .021   | 1.308  | .423   |
| 3.500    | -829.1      | 3.500 | .000   | .000   | .918   | .021   | 1.308  | .423   |
| 3.700    | -661.8      | 3.700 | .000   | .000   | .918   | .021   | 1.308  | .423   |
| 3.900    | -534.1      | 3.900 | .000   | .000   | .918   | .021   | 1.308  | .423   |
| 4.100    | -423.8      | 4.100 | .000   | .000   | .918   | .021   | 1.308  | .423   |
| 4.300    | -339.0      | 4.300 | .000   | .000   | .918   | .021   | 1.308  | .423   |
| 4.500    | -268.9      | 4.500 | .000   | .000   | .918   | .021   | 1.308  | .423   |
| 4.700    | -214.8      | 4.700 | .000   | .000   | .918   | .021   | 1.308  | .423   |
| 4.900    | -170.3      | 4.900 | .000   | .000   | .918   | .021   | 1.308  | .423   |
| 5.100    | -134.2      | 5.100 | .000   | .000   | .918   | .021   | 1.308  | .423   |
| 5.300    | -106.7      | 5.300 | .000   | .000   | .918   | .021   | 1.308  | .423   |
| 5.500    | -84.38      | 5.500 | .000   | .000   | .918   | .021   | 1.308  | .423   |
| 5.700    | -66.18      | 5.700 | .000   | .000   | .918   | .021   | 1.308  | .423   |
| 5.900    | -52.89      | 5.900 | .000   | .000   | .918   | .021   | 1.308  | .423   |
| 6.100    | -41.71      | 6.100 | .000   | .000   | .918   | .021   | 1.308  | .423   |
| 6.300    | -33.02      | 6.300 | .000   | .000   | .918   | .021   | 1.308  | .423   |
| 6.500    | -26.04      | 6.500 | .000   | .000   | .918   | .021   | 1.308  | .423   |
| 6.700    | -20.61      | 6.700 | .000   | .000   | .918   | .021   | 1.308  | .423   |
| 6.900    | -16.31      | 6.900 | .000   | .000   | .918   | .021   | 1.308  | .423   |
| 7.100    | -12.85      | 7.100 | .000   | .000   | .918   | .021   | 1.308  | .423   |
| 7.300    | -10.11      | 7.300 | .000   | .000   | .918   | .021   | 1.308  | .423   |
| 7.500    | -7.988      | 7.500 | .000   | .000   | .918   | .021   | 1.308  | .423   |
| 7.700    | -6.349      | 7.700 | .000   | .000   | .918   | .021   | 1.308  | .423   |
| 7.900    | -4.976      | 7.900 | .000   | .000   | .918   | .021   | 1.308  | .423   |
| 8.100    | -3.962      | 8.100 | .000   | .000   | .918   | .021   | 1.308  | .423   |

Note: x1, y1, and z1 are the Cartesian coordinates for the pivot point in fragment 1 in the reference Cartesian coordinate system.

Similar definitions hold for fragment 2.

Vmep and rmep are the minimum potential and corresponding coordinate for the TS dividing surface defined by R and these pivot point vectors

\*\*\*\*\* Partition function results \*\*\*\*\*

The partition functions for the complex and the fragments are evaluated relative to their respective zero-point levels. That for



**Hydrogen-abstraction reactions of methyl ketones,  $H_3COCH_{3-x}(CH_3)_x$ ,  $x=0-2$ , by  $\cdot OH$ ;** Chong-Wen Zhou  $C^3$   
the TS is instead evaluated relative to the zero-point level of the fragments. The partition function for the fragments includes the contribution from relative translational motions. Those for the complex and the TS do not contain any translational contributions

| Temp (K) | Q_Fragments (cm <sup>-3</sup> ) | Q_TS     | (Monte Carlo err) (%) |
|----------|---------------------------------|----------|-----------------------|
| 500.     | .193E+37                        | .147E+11 | 4.4                   |
| 600.     | .176E+38                        | .123E+12 | 4.6                   |
| 700.     | .139E+39                        | .100E+13 | 4.8                   |
| 800.     | .980E+39                        | .767E+13 | 4.9                   |
| 900.     | .624E+40                        | .544E+14 | 5.0                   |
| 1000.    | .364E+41                        | .358E+15 | 5.0                   |
| 1200.    | .994E+42                        | .123E+17 | 5.1                   |
| 1400.    | .210E+44                        | .325E+18 | 5.0                   |
| 1600.    | .358E+45                        | .672E+19 | 4.9                   |
| 1800.    | .505E+46                        | .113E+21 | 4.9                   |
| 2000.    | .605E+47                        | .157E+22 | 4.8                   |

\*\*\*\*\* High pressure limit rate constants \*\*\*\*\*

For D0 = 10982. cm<sup>-1</sup>

| Temp (K) | k <sub>bi</sub> -TST (cm <sup>3</sup> /s) | MonteCarlo error rel (%) | [0 error==>quadrature] |
|----------|-------------------------------------------|--------------------------|------------------------|
| 500.     | .7937E-13                                 | 4.37                     |                        |
| 600.     | .8700E-13                                 | 4.59                     |                        |
| 700.     | .1047E-12                                 | 4.77                     |                        |
| 800.     | .1304E-12                                 | 4.90                     |                        |
| 900.     | .1637E-12                                 | 4.98                     |                        |
| 1000.    | .2046E-12                                 | 5.03                     |                        |
| 1200.    | .3107E-12                                 | 5.05                     |                        |
| 1400.    | .4506E-12                                 | 5.02                     |                        |
| 1600.    | .6258E-12                                 | 4.95                     |                        |
| 1800.    | .8366E-12                                 | 4.87                     |                        |
| 2000.    | .1083E-11                                 | 4.79                     |                        |

**Variflex input for channel 1b in EMK + OH without USTTSP:**

! Multiwell Test Calculation and Sample Input

\*Title

& EMK + OH\_TS1 (G3\_MP2) E/J Resolved Test Case

\*CalculationType

**Hydrogen-abstraction reactions of methyl ketones,  $\text{H}_3\text{COCH}_3\text{-(CH}_3\text{)}_x$ ,  $x=0-2$ , by  $\cdot\text{OH}$ ;** Chong-Wen Zhou  $\text{C}^3$

AssociationP

NeutralP

EJResP

HighPresP

ChannelsD

1

\*CalculationRanges

! Range of temperatures

TRangeP ListDQ

11

ValuesL

500

600

700

800

900

1000

1200

1400

1600

1800

2000

DZeroRangeP StepDQ

10982.15, 100.0, 1

\*ConvolutionRanges

ERangeP StepDQ

-10982.15, 150., 800

JRangeP StepDQ

1, 10, 25

\*Complex !PC1

!\*\*\*\*\* Structure Input \*\*\*\*\*

! The following lines are typical input for the molecular structure  
! input module, in this case giving input for the complex.

**Hydrogen-abstraction reactions of methyl ketones,  $H_3COCH_{3-x}(CH_3)_x$ ,  $x=0-2$ , by  $\cdot OH$ ;** Chong-Wen Zhou  $C^3$

```
NearProlateP      !Molecule type

NElecStatesD      !Number of states
  1
ElecStatesL       !List of electronic state degeneracies and energies
  2, 0.0

NModesD           !Number of modes, correction factor
  39, 0.9496
ModesL            !List of mode frequencies
49.4, 64.6, 114.8, 149.3, 183.9, 218.0, 279.0, 315.9, 351.1, 421.9,
513.5, 608.6,
676.2, 682.0, 797.1, 824.5, 980.8, 1029.9, 1095.4, 1128.7, 1231.0,
1292.6, 1402.2,
1434.5, 1466.0, 1483.6, 1514.6, 1520.2, 1707.9, 2051.6, 3071.6, 3094.3,
3117.8,
3185.2, 3192.5, 3196.9, 3335.2, 3772.8, 3964.0

SigRotD           !Rotational symmetry number for molecule
  1.0

RotConstP
MassD
  89.0

RotConstD !Rotational constants (cm-1)
  0.2267, 0.0500, 0.0433

!*****

EVCStepD          ! step size for complex density of states
  1.0

!End of complex input
*Channell1

*Fragments

!*****
! Structure data for OH fragment
!*****

LinearP
NElecStatesD
```

Hydrogen-abstraction reactions of methyl ketones,  $\text{H}_3\text{COCH}_3\text{-(CH}_3\text{)}_x$ ,  $x=0-2$ , by  $\cdot\text{OH}$ ; Chong-Wen Zhou  $\text{C}^3$

2

ElecStatesL

2, 0.0

2, 137.

NModesD

1, 0.9496

ModesL

3857.1

SigRotD

1.0

CartesianP

NAtomsD

2

PositionL

1.00000 .000000 .000000 .917779

15.9949 .000000 .000000 -.573795E-01

!\*\*\*\*\*

! Structure data for EMK fragment

!\*\*\*\*\*

NearprolateP

NElecStatesD

1

ElecStatesL

1, 0.0

NModesD

32, 0.9496

ModesL

68.58, 108.71, 252.3, 400.7, 469.5, 595.5, 762.7, 782.0, 955.8, 965.8,  
1019.1, 1124.8, 1139.0, 1205.2, 1296.6, 1381.5, 1406.8, 1432.7, 1471.8,  
1487.8, 1499.1, 1516.3, 1520.6, 1781.4, 3066.8, 3077.9, 3090.3, 3112.4,  
3161.5, 3179.2, 3187.3, 3202.2

!FreeRotorD

!1

!FreeRotorL

!5.56

HindRotorD

1

!HindTypeD !Methyl 108.71

!1

!HindParL

**Hydrogen-abstraction reactions of methyl ketones,  $\text{H}_3\text{COCH}_{3-x}(\text{CH}_3)_x$ ,  $x=0-2$ , by  $\cdot\text{OH}$ ;** Chong-Wen Zhou  $\text{C}^3$

!5.6 153.89 3

HindTypeD ! Methyl 221.20

1

HindParL

5.6 860.38 3

!HindTypeD ! Ethyl 68.58

!4

!HindParL

!1.183 905.63, 1664.8, -1563.27

SigRotD

1.00

CartesianP

NAtomsD

13

PositionL

|         |              |              |          |
|---------|--------------|--------------|----------|
| 16.0000 | .214588E-01  | 1.30830      | .422583  |
| 12.0000 | .206906E-01  | .937513E-01  | .505941  |
| 12.0000 | -.456053E-01 | -.619781     | 1.84341  |
| 1.00000 | .668532      | -1.44746     | 1.88033  |
| 1.00000 | .150492      | .881401E-01  | 2.64933  |
| 1.00000 | -1.04777     | -1.04324     | 1.97170  |
| 12.0000 | .740843E-01  | -.797903     | -.725669 |
| 1.00000 | 1.02695      | -1.34301     | -.687838 |
| 1.00000 | -.707645     | -1.56179     | -.626983 |
| 12.0000 | -.612228E-01 | -.227709E-01 | -2.03039 |
| 1.00000 | .143733E-02  | -.695476     | -2.88957 |
| 1.00000 | -1.01819     | .502880      | -2.06673 |
| 1.00000 | .727492      | .727620      | -2.11105 |

\*TransState !ts1\_G3

NElecStatesD

1

ElecStatesL

2, 0.0

RRHOP

NearProlateP

NModesD

37, 0.9496

ModesL

**Hydrogen-abstraction reactions of methyl ketones,  $\text{H}_3\text{COCH}_3\text{-(CH}_3\text{)}_x$ ,  $x=0-2$ , by  $\cdot\text{OH}$ ;** Chong-Wen Zhou  $C^3$   
38.7, 89.33, 147.8, 254.7, 294.6, 368.7, 436.3, 477.8, 593.9,  
727.7, 762.5, 821.6, 930.5, 973.3, 1018.7, 1030.3, 1129.0, 1132.4,  
1229.0,  
1240.7, 1298.8, 1391.8, 1433.3, 1456.1, 1467.8, 1516.1, 1520.5, 1561.5,  
1783.6,  
3068.5, 3092.2, 3113.0, 3125.6, 3182.8, 3188.7, 3211.1, 3781.3

HindRotorD

1

HindTypeD ! Methyl 223.70, 2.5 kal/mol

1

HindParL

5.49 874.38 3

!HindTypeD ! Ethyl 89.33

!4

!HindParL

!0.97, 3.07, -1953.64, 1924.98

SigRotD

1.0

RotConstP

MassD

89.0

RotConstD

0.2600, 0.0567, 0.0467

EckTunD

2101.1, 2588.15, 10142.75 !G3

TSEnergyD

734.475 !2.1\*349.64

!End of channel 1 input

\*End

**Variflex output for channel 1b in EMK + OH without USTTSP:**

\*\*\*\*\*

\*

\*

\* VARIFLEX: VERSION 1.00; (July 16, 1999) \*

\* S. J. Klippenstein, A. F. Wagner, R. C. Dunbar, \*

**Hydrogen-abstraction reactions of methyl ketones,  $H_3COCH_{3-x}(CH_3)_x$ ,  $x=0-2$ , by  $\cdot OH$ ;** Chong-Wen Zhou  $C^3$

\* D. M. Wardlaw, and S. H. Robertson \*

\*

\*

\*\*\*\*\*

EMK + OH\_TS1 (G3\_MP2) E/J Resolved Test Case

\*\*\*\*\* Calculation Type \*\*\*\*\*

Thermal association rate constants will be evaluated  
for 1 channels in a radical-radical reaction  
The component rates will be evaluated at the E/J resolved level  
for the high stabilization efficiency (high P) limit

\*\*\*\*\* Calculation Ranges \*\*\*\*\*

Temperatures (K)

500.00 600.00 700.00 800.00 900.00 1000.00  
1200.00 1400.00 1600.00 1800.00 2000.00

D0 values (cm-1)

ranging from 10982.15 to 10982.15 in steps of 100.00

\*\*\*\*\* Convolution Ranges \*\*\*\*\*

Energy values relative to separated fragments (cm-1)

ranging from -10982.15 to 108867.85 in steps of 150.00

The total angular momentum J will

cover the range from 1 to 241 in steps of 10

\*\*\*\*\* Complex Data \*\*\*\*\*

Electronic state degeneracies and energies (cm-1)

2 .00000

Corrected Vibrational frequencies (cm-1)

46.9 61.3 109.0 141.8 174.6 207.0 264.9 300.0 333.4  
400.6  
487.6 577.9 642.1 647.6 756.9 782.9 931.4 978.0 1040.2  
1071.8  
1169.0 1227.5 1331.5 1362.2 1392.1 1408.8 1438.3 1443.6 1621.8 1948.2  
2916.8 2938.3 2960.7 3024.7 3031.6 3035.8 3167.1 3582.7 3764.2

Zero point energy = 26360. cm-1

**Hydrogen-abstraction reactions of methyl ketones,  $\text{H}_3\text{COCH}_{3-x}(\text{CH}_3)_x$ ,  $x=0-2$ , by  $\cdot\text{OH}$ ;** Chong-Wen Zhou  $C^3$

Rotational symmetry number is 1.00

The complex is a near prolate top with

rotational constants of .2267 .5000E-01 .4330E-01 (cm<sup>-1</sup>)

and symmetrized rotational constants of .2267 .4665E-01 (cm<sup>-1</sup>)

vib. step size for complex density of states = 1.00 cm<sup>-1</sup>

Warning in complex: The complex data is irrelevant since  
a high pressure association is being considered

\*\*\*\*\* Data for fragment 1 of channel 1 \*\*\*\*\*

Electronic state degeneracies and energies (cm<sup>-1</sup>)

2 .00000

2 137.00

Corrected Vibrational frequencies (cm<sup>-1</sup>)

3662.7

Zero point energy = 1831.4 cm<sup>-1</sup>

Rotational symmetry number is 1.00

Fragment1 is linear with

a rotational constant of 18.84 (cm<sup>-1</sup>)

\*\*\*\*\* Data for fragment 2 of channel 1 \*\*\*\*\*

Electronic state degeneracies and energies (cm<sup>-1</sup>)

1 .00000

Corrected Vibrational frequencies (cm<sup>-1</sup>)

65.1 103.2 239.6 380.5 445.8 565.5 724.3 742.6 907.6  
917.1

967.7 1068.1 1081.6 1144.5 1231.3 1311.9 1335.9 1360.5 1397.6 1412.8  
1423.5 1439.9 1444.0 1691.6 2912.2 2922.8 2934.5 2955.5 3002.2 3019.0  
3026.7 3040.8

Zero point energy = 23608. cm<sup>-1</sup>

1mode(s) will be treated as 1-dhindered rotors

For mode 1 A type 1 treatment with data = 5.600 860.4  
3.000



**Hydrogen-abstraction reactions of methyl ketones,  $\text{H}_3\text{COCH}_{3-x}(\text{CH}_3)_x$ ,  $x=0-2$ , by  $\cdot\text{OH}$ ;** Chong-Wen Zhou  $C^3$   
Rotational symmetry number is 1.00

Fragment2 is a near prolate top with  
rotational constants of .3164 .1207 .9195E-01 (cm-1)

\*\*\*\*\* Orientation tests for each fragment \*\*\*\*\*

Fragment1 is a Linear top  
Mass (g/mol) Ref.x (Ang) Ref.y (Ang) Ref.z (Ang) for fragment  
1  
1.00000 .000000 .000000 .917779  
15.9949 .000000 .000000 -.573795E-01  
Moments (amu\*A\*\*2): .894980 .894980 .000000

Fragment2 is a prolate Asymmetric top  
Mass (g/mol) Ref.x (Ang) Ref.y (Ang) Ref.z (Ang) for fragment  
2  
16.0000 .214588E-01 1.30830 .422583  
12.0000 .206906E-01 .937510E-01 .505941  
12.0000 -.456053E-01 -.619781 1.84341  
1.00000 .668532 -1.44746 1.88033  
1.00000 .150492 .881398E-01 2.64933  
1.00000 -1.04777 -1.04324 1.97170  
12.0000 .740843E-01 -.797903 -.725669  
1.00000 1.02695 -1.34301 -.687838  
1.00000 -.707645 -1.56179 -.626983  
12.0000 -.612228E-01 -.227712E-01 -2.03039  
1.00000 .143732E-02 -.695476 -2.88957  
1.00000 -1.01819 .502880 -2.06673  
1.00000 .727492 .727620 -2.11105  
Moments (amu\*A\*\*2): 183.329 139.719 53.2846

\*\*\*\*\* Transition State Treatment Data \*\*\*\*\*

A statistical treatment of the conserved mode vibrational  
contribution to the transition state partition functions  
will be performed

The default step size of 1.00 cm-1 will be used for the  
convolution of the conserved mode vibrations  
and the default step size of 50.00 cm-1 will  
be used for the generation of the transitional mode number of states

A statistical treatment of the electronic state contributions  
will be performed

**Hydrogen-abstraction reactions of methyl ketones,  $\text{H}_3\text{COCH}_{3-x}(\text{CH}_3)_x$ ,  $x=0-2$ , by  $\cdot\text{OH}$ ;** Chong-Wen Zhou  $\text{C}^3$   
for all 1 electronic states in the transition state region

For effective TS location 1  
of electronic state 1 in channel 1  
the number of states will be evaluated according to  
Rigid Rotor Harmonic Oscillator assumptions for the energetics

\*\*\*\*\* RRHO data \*\*\*\*\*

Corrected Vibrational frequencies (cm-1)  
36.7 84.8 140.4 241.9 279.8 350.1 414.3 453.7 564.0  
691.0  
724.1 780.2 883.6 924.2 967.4 978.4 1072.1 1075.3 1167.1 1178.2  
1233.3 1321.7 1361.1 1382.7 1393.8 1439.7 1443.9 1482.8 1693.7 2913.8  
2936.4 2956.1 2968.1 3022.4 3028.0 3049.3 3590.7

Zero point energy = 25112. cm-1

1mode(s) will be treated as 1-dhindered rotors  
For mode 1 A type 1 treatment with data = 5.490 874.4  
3.000

Rotational symmetry number is 1.00  
The TS is a near prolate top  
rot. constants .26000 .56700E-01 .46700E-01 (cm-1)  
symm. rot. constants .26000 .51700E-01 (cm-1)  
With an Eckart tunneling correction  
for an imaginary barrier frequency of 2101. cm-1  
and with the reactants and products located 2588.  
and .1014E+05  
cm-1 below the barrier

Delta H\_0 for channel 1 TS relative to channel 1 is 734.48 cm-1

\*\*\*\*\* End of all input \*\*\*\*\*

\*\*\*\*\* Partition function results \*\*\*\*\*

The partition functions for the complex and the fragments are  
evaluated relative to their respective zero-point levels. That for  
the TS is instead evaluated relative to the zero-point level of  
the fragments. The partition function for the fragments includes the  
contribution from relative translational motions. Those for the  
complex and the TS do not contain any translational contributions

Hydrogen-abstraction reactions of methyl ketones,  $\text{H}_3\text{COCH}_{3-x}(\text{CH}_3)_x$ ,  $x=0-2$ , by  $\cdot\text{OH}$ ; Chong-Wen Zhou  $\text{C}^3$

| Temp<br>(K) | Q_Fragments<br>( $\text{cm}^{-3}$ ) | Q_TS<br>(%) | (Monte Carlo err<br>0==>quadrature) |
|-------------|-------------------------------------|-------------|-------------------------------------|
| 500.        | .193E+37                            | .147E+11    | .0                                  |
| 600.        | .176E+38                            | .123E+12    | .0                                  |
| 700.        | .139E+39                            | .100E+13    | .0                                  |
| 800.        | .980E+39                            | .765E+13    | .0                                  |
| 900.        | .624E+40                            | .543E+14    | .0                                  |
| 1000.       | .364E+41                            | .356E+15    | .0                                  |
| 1200.       | .994E+42                            | .123E+17    | .0                                  |
| 1400.       | .210E+44                            | .323E+18    | .0                                  |
| 1600.       | .358E+45                            | .668E+19    | .0                                  |
| 1800.       | .505E+46                            | .112E+21    | .0                                  |
| 2000.       | .605E+47                            | .156E+22    | .0                                  |

\*\*\*\*\* High pressure limit rate constants \*\*\*\*\*

For D0 = 10982.  $\text{cm}^{-1}$

| Temp<br>(K) | $k_{\text{bi-TST}}$<br>( $\text{cm}^3/\text{s}$ ) | MonteCarlo error<br>rel(%) | [0 error==>quadrature] |
|-------------|---------------------------------------------------|----------------------------|------------------------|
| 500.        | .7953E-13                                         | .000                       |                        |
| 600.        | .8694E-13                                         | .000                       |                        |
| 700.        | .1046E-12                                         | .000                       |                        |
| 800.        | .1302E-12                                         | .000                       |                        |
| 900.        | .1632E-12                                         | .000                       |                        |
| 1000.       | .2039E-12                                         | .000                       |                        |
| 1200.       | .3092E-12                                         | .000                       |                        |
| 1400.       | .4480E-12                                         | .000                       |                        |
| 1600.       | .6217E-12                                         | .000                       |                        |
| 1800.       | .8305E-12                                         | .000                       |                        |
| 2000.       | .1075E-11                                         | .000                       |                        |
